# Supplementary material
Source: ML conference proceedings conference paper supplement (https://openreview.net/forum?id=dBSoa8fpV7)
Supplement: supplementary_material [file attachment]

---

# PEACE: A Dataset of Pharmaceutical Care for Cancer Pain Analgesia Evaluation and Medication Decision (Dataset Documentation)

---

## 1 Data Sheet

### 1.1 Motivation

**Q: For what purpose was the dataset created? Was there a specific task in mind? Was there a specific gap that needed to be filled? Please provide a description.**

A: The PEACE dataset was created to advance cancer pain medication research by addressing existing gaps in available datasets. It aims to improve cancer pain management through comprehensive data collection, including long-term and multiple follow-ups, multidisciplinary treatment (MDT) team assessments, and patient self-perceptions of medication effects and impacts on their lives.

**Q: Who created the dataset (e.g., which team, research group) and on behalf of which entity (e.g., company, institution, organization)?**

A: The dataset was jointly developed by a collaborative effort from the research groups:

1. Central South University
2. Hunan University
3. The University of Sydney

**Q: Who funded the creation of the dataset? If there is an associated grant, please provide the name of the grantor and the grant name and number**

A: Funding provided by The Fundamental Research Funds for the Central South University.

**Q: Any other comments?**

A: None

### 1.2 Composition

#### 1.2.1 Instances and Representation

**Q: What do the instances that comprise the dataset represent?**

A: The instances in the dataset represent patient information related to cancer pain management, including demographics, clinical signs, medication details, physiological parameters, pain assessment, treatment outcomes, and follow-up information.

**Q: How many instances are there in total?**

A: The dataset includes 103 features from more than 38,000 patients.

**Q: Does the dataset contain all possible instances or is it a sample?**

A: The dataset is a sample of instances selected based on inclusion criteria such as definitive

30 cancer diagnosis with pain and exclusion criteria like incomplete key medical records or significant  
31 complications.

32 **Q: What data does each instance consist of?**

33 A: Each instance consists of demographic data, clinical signs, medication details, physiological  
34 parameters, treatment outcomes, pain assessment, and follow-up data.

35 **Q: Is there a label or target associated with each instance?**

36 A: Yes, each instance has multiple labels or targets associated with it, including pain assessment  
37 scores, treatment decisions, and follow-up outcomes.

38 **Q: Is any information missing from individual instances?**

39 A: Some instances may have missing information due to unavailability at the time of data collection.

40 **Q: Are relationships between individual instances made explicit?**

41 A: Relationships are made explicit through linkages between patient records and treatment outcomes,  
42 pain assessments, and follow-up data.

43 **Q: Are there recommended data splits?**

44 A: We recommend that 80% of the dataset be used to build the model via 5-fold cross-validation, and  
45 the remaining 20% be used as an independent test set.

46 **Q: Are there any errors, sources of noise, or redundancies in the dataset?**

47 A: The PEACE dataset includes some errors, sources of noise, and redundancies.

48       • Errors and Noise Sources: Inconsistencies and anomalies due to human errors were ad-  
49       dressed through expert consultation and the removal of data points to prevent model bias  
50       and improve robustness.

51       • Redundancies: Useful fields from duplicate records were merged, and some features were  
52       categorized to enhance usability in machine learning tasks. These measures ensure the  
53       consistency and reliability of the PEACE dataset, providing a high-quality foundation for  
54       cancer pain medication therapy research.

55 **Q: Is the dataset self-contained, or does it link to or otherwise rely on external resources?**

56 A: The dataset is self-contained and does not rely on external resources.

57 **Q: Does the dataset contain data that might be considered confidential?**

58 A: Yes, the dataset contains sensitive health information that has been de-identified to comply with  
59 privacy regulations.

60 **Q: Does the dataset contain data that might be offensive, insulting, threatening, or cause  
61 anxiety?**

62 A: There is no indication that the dataset contains such data. It focuses on clinical and health-related  
63 information.

64 **Q: Does the dataset identify any subpopulations?**

65 A: No

66 **Q: Is it possible to identify individuals from the dataset?**

67 A: No, it is not possible to identify individuals directly or indirectly as all protected health information  
68 is de-identified.

69 **Q: Does the dataset contain data that might be considered sensitive in any way?**

70 A: Yes, it includes health data which is considered sensitive. Measures are taken to ensure this data is  
71 handled according to privacy regulations.

## 72 1.3 Collection Process

### 73 1.3.1 Data Acquisition

74 **Q: How was the data associated with each instance acquired?**

75 A: The data was acquired through a combination of direct observation and self-reports from patients.  
76 Data sources include manually collected hospital records and an online follow-up platform. Data  
77 validation involved cross-referencing with hospital records and expert reviews.

78 **Q: What mechanisms or procedures were used to collect the data?**

79 A: Data collection mechanisms included manual curation by clinical staff and automated data entry  
80 from the online follow-up platform. Validation procedures involved expert reviews and consistency  
81 checks across multiple data points.

82 **Q: If the dataset is a sample from a larger set, what was the sampling strategy?**

83 A: The dataset combines clinical features from Xiangya Hospital with data from our online cancer  
84 pain follow-up platform. It encompasses a wide range of patient information, including demographics,  
85 clinical signs, medications, physiological parameters, treatment outcomes, and others. This data  
86 reflects the complete daily records of doctors and clinical pharmacists, and the data were collected  
87 and collated manually without specific sampling.

88 **Q: Who was involved in the data collection process?**

89 A: Data collection involved clinical staff, including doctors, nurses, and pharmacists. No additional  
90 crowdworkers or contractors were involved.

91 **Q: Over what timeframe was the data collected?**

92 A: Data collection aligned with hospital record-keeping and follow-up timelines, spanning multiple  
93 years from 2016 onwards. This timeframe matches the creation dates of the instance data.

94 **Q: Were any ethical review processes conducted?**

95 A: Yes, ethical review was conducted by the Institutional Review Board of Xiangya Hospital, with  
96 Ethics Approval ID: 202109422. Informed consent was obtained from patients, and data was  
97 de-identified to protect privacy.

### 98 1.3.2 Data Source and Consent

99 **Q: Did you collect the data from the individuals in question directly, or obtain it via third  
100 parties or other sources?**

101 A: Data was collected directly from the individuals during hospital visits and through the online  
102 follow-up platform.

103 **Q: Were the individuals in question notified about the data collection?**

104 A: Yes, individuals were notified through informed consent forms detailing the data collection process,  
105 its purpose, and the measures taken to protect their privacy.

106 **Q: Did the individuals in question consent to the collection and use of their data?**

107 A: Yes, individuals provided informed consent for data collection and use. The consent process  
108 included detailed information on how the data would be used and measures to ensure confidentiality.

109 **Q: If consent was obtained, were the consenting individuals provided with a mechanism to  
110 revoke their consent in the future or for certain uses?**

111 A: According to the use agreement, either party may terminate the agreement at any time. However,  
112 obligations regarding restricted data from PEACE will persist even after termination.

### 113 1.3.3 Impact Analysis

114 **Q: Has an analysis of the potential impact of the dataset and its use on data subjects been  
115 conducted?**

116 A: The data was de-identified and ethical approvals were obtained to minimize any potential negative  
117 impacts.

## 118 1.4 Preprocessing and Cleaning

119 **Q: Was any preprocessing/cleaning/labeling of the data done?**

120 A: Yes, extensive preprocessing, cleaning, and labeling of the data were performed. The raw medica-  
121 tion data presented challenges such as noise, complex attribute relationships, and high dimensionality.  
122 Issues like disorganization, duplicate records, and missing information were addressed through a  
123 comprehensive preprocessing pipeline. This included standardizing synonym variations within pain  
124 intensity labels (e.g., "burning pain," "scalding pain," and "burn-like pain" were standardized to  
125 "burning-type pain") and merging useful fields from duplicate records to enhance data quality.

126 **Q: Was the “raw” data saved in addition to the preprocessed/cleaned/labeled data?**

127 A: The raw data is retained in the internal database of Xiangya Hospital.

128 **Q: Is the software that was used to preprocess/clean/label the data available?**

129 A: No.

130 **Q: Any other comments?**

131 A: None

## 132 2 Dataset Nutrition Labels

### 133 2.1 Metadata Module

- 134 • **Filename:** PEACE
- 135 • **File format:** CSV
- 136 • **URL:** <https://github.com/YTYTYD/PEACE>
- 137 • **Domain:** Pharmaceutical care for cancer pain management
- 138 • **Keywords:** Cancer pain, pain management, pharmaceutical care, medication decision,  
139 analgesia evaluation
- 140 • **Type:** Patient health records
- 141 • **Dataset size:** Over 38,000 patients with 103 features each
- 142 • **Percentage of missing cells:** Some instances may have missing information due to unavail-  
143 ability at the time of data collection
- 144 • **License:** CC-BY
- 145 • **Collection range:** From 2016 To 2023
- 146 • **Description:** The PEACE dataset was created to advance cancer pain medication research  
147 by addressing existing gaps in available datasets. It aims to improve cancer pain manage-  
148 ment through comprehensive data collection, including long-term and multiple follow-ups,  
149 multidisciplinary treatment team assessments, and patient self-perceptions of medication  
150 effects and impacts on their lives.

### 151 2.2 Provenance Module

- 152 • **Source:** From Xiangya Hospital and data from a cancer pain online follow-up platform
- 153 • **Version history:** Version 1.0

### 154 2.3 Variables Module

155 Patients in the PEACE dataset have the following variables (for data type, B: Binary, N: Numeric, M:  
156 Multiclass, \*: Label):

#### 157 Patient Basic Information(50)

##### 158 1. Demographics

- **ID (N)**: A unique random identification number assigned to each patient.
- **Gender (B)**: The gender of the patient.
- **Age (N)**: The age of the patient.
- **Height (N)**: The height of the patient.
- **Weight (N)**: The weight of the patient.
- **BMI (N)**: A common indicator for assessing body fat, calculated using weight and height.
- **Body Surface Area (BSA) (N)**: The total surface area of the human body.
- **Medical Record Date (N)**: The date on which the doctor makes a decision regarding cancer pain medication treatment based on a comprehensive pain assessment.
- **Length of Hospital Stay (N)**: The duration of the patient's stay during the current hospital visit, measured in days.
- **Number of Hospital Admissions (N)**: The total number of times the patient has been hospitalized due to tumour diseases.
- **Diagnosis (M)**: The diagnosis provided by the doctor at the time of discharge, only including tumour-related diseases.
- **Smoking History (B)**: Whether the patient has a history of smoking continuously for 6 months or more.
- **Drinking History (B)**: Whether the patient has a history of drinking alcohol at least once a week for 6 months or more.
- **Allergy History (B)**: Whether the patient has experienced allergic reactions.
- **Tumour Treatment Methods (M)**: The methods of tumour treatment, including surgery, chemotherapy, radiotherapy, targeted therapy, and immunotherapy.
- **Gastrointestinal Risk (B)**: The likelihood of the patient developing gastrointestinal diseases (such as gastric ulcers, gastritis, enteritis) or related adverse reactions (such as gastrointestinal bleeding, indigestion) after taking pain medication.
- **Cardiovascular Risk (B)**: The likelihood of the patient developing cardiovascular diseases (such as hypertension, coronary heart disease, myocardial infarction) or related adverse reactions (such as arrhythmia, heart failure) after taking pain medication.
- **PS Score (N)**: The performance status score.

## 2. Laboratory Examination Variables

### (a) Complete Blood Count:

- **White Blood Cell Count (N)**: The number of white blood cells in a unit volume of blood.
- **Red Blood Cell Count (N)**: The number of red blood cells in a unit volume of blood.
- **Hemoglobin (N)**: The amount of hemoglobin in a unit volume of blood.
- **Platelet Count (N)**: The number of platelets in a unit volume of blood.
- **Hematocrit (N)**: The volume percentage of red blood cells in blood.
- **Neutrophil Count (N)**: The number of neutrophils in a unit volume of blood.
- **Lymphocyte Count (N)**: The number of lymphocytes in a unit volume of blood.
- **Eosinophil Count (N)**: The number of eosinophils in a unit volume of blood.
- **Basophil Count (N)**: The number of basophils in a unit volume of blood.
- **Monocyte Percentage (N)**: The proportion of monocytes in the total white blood cell count.
- **Neutrophil Percentage (N)**: The proportion of neutrophils in the total white blood cell count.
- **Lymphocyte Percentage (N)**: The proportion of lymphocytes in the total white blood cell count.

- 208 • **Basophil Percentage (N):** The proportion of basophils in the total white blood cell  
209 count.
- 210 • **Eosinophil Percentage (N):** The proportion of eosinophils in the total white blood  
211 cell count.
- 212 • **Mean Corpuscular Volume (N):** The average volume of a single red blood cell.
- 213 • **Mean Corpuscular Hemoglobin (N):** The average amount of hemoglobin in a  
214 single red blood cell.
- 215 • **Mean Corpuscular Hemoglobin Concentration (N):** The average concentration  
216 of hemoglobin in a single red blood cell.
- 217 • **Red Cell Distribution Width (N):** The variation in the size of red blood cells.
- 218 • **Plateletcrit (N):** The volume percentage of platelets in blood.
- 219 • **Mean Platelet Volume (N):** The average volume of a single platelet.

220 (b) **Liver Function:**

- 221 • **Total Protein (N):** The total amount of proteins in a unit volume of blood.
- 222 • **Albumin (N):** The amount of albumin in a unit volume of blood.
- 223 • **Globulin (N):** The amount of globulin in a unit volume of blood.
- 224 • **Albumin/Globulin Ratio (N):** The ratio of albumin to globulin in blood.
- 225 • **Total Bilirubin (N):** The total amount of bilirubin in a unit volume of blood.
- 226 • **Direct Bilirubin (N):** The amount of direct (conjugated) bilirubin in a unit volume  
227 of blood.
- 228 • **Total Bile Acids (N):** The total amount of bile acids in a unit volume of blood.
- 229 • **Alanine Aminotransferase (N):** The amount of alanine aminotransferase (ALT) in  
230 a unit volume of blood.
- 231 • **Aspartate Aminotransferase (N):** The amount of aspartate aminotransferase  
232 (AST) in a unit volume of blood.

233 (c) **Kidney Function:**

- 234 • **Urea (N):** The amount of urea in a unit volume of blood, reflecting kidney excretory  
235 function.
- 236 • **Creatinine (N):** The amount of creatinine in a unit volume of blood, reflecting  
237 kidney filtration function.
- 238 • **Uric Acid (N):** The amount of uric acid in a unit volume of blood, reflecting kidney  
239 excretory function and purine metabolism status.

240 **Comprehensive Pain Assessment (15):**

- 241 • **Pain Type (M):** Classification of pain based on the pathological mechanism.
- 242 • **Worst Pain (N):** The highest level of pain experienced in the last 24 hours, assessed using  
243 the Numerical Rating Scale (NRS).
- 244 • **Mildest Pain (N):** The lowest level of pain experienced in the last 24 hours, assessed using  
245 NRS.
- 246 • **Average Pain (N):** The average level of pain experienced in the last 24 hours, assessed using  
247 NRS.
- 248 • **Current Pain (N):** The current level of pain, assessed using NRS.
- 249 • **Impact of Pain on Daily Life (N):** The degree to which daily life was affected by pain in  
250 the past week.
- 251 • **Impact of Pain on Mood (N):** The degree to which mood was affected by pain in the past  
252 week.
- 253 • **Impact of Pain on Walking Ability (N):** The degree to which walking ability was affected  
254 by pain in the past week.
- 255 • **Impact of Pain on Daily Work (N):** The degree to which daily work was affected by pain  
256 in the past week.

- 257 • **Impact of Pain on Relationships with Others (N):** The degree to which relationships with  
258 others were affected by pain in the past week.
- 259 • **Impact of Pain on Sleep (N):** The degree to which sleep was affected by pain in the past  
260 week.
- 261 • **Impact of Pain on Interest in Life (N):** The degree to which interest in life was affected by  
262 pain in the past week.
- 263 • **Pain Frequency (M):** The number of times pain occurred in a day for cancer pain patients.
- 264 • **Type of Breakthrough Pain (M):** Classification of breakthrough pain according to the  
265 National Comprehensive Cancer Network (NCCN).
- 266 • **Frequency of Breakthrough Pain (M):** The number of times breakthrough pain occurred  
267 in a day for cancer pain patients.

268 **Previous Analgesic Treatment(23):**

- 269 • **Prev\_Extended Release Strong Opiates (ERSO) (N):** The number of types of extended-  
270 release strong opiates used by the patient in the past week.
- 271 • **Prev\_Immediate Release Strong Opiates (IRSO) (N):** The number of types of immediate-  
272 release strong opiates used by the patient in the past week.
- 273 • **Prev\_Extended Release Weak Opiates (ERWO) (N):** The number of types of extended-  
274 release weak opiates used by the patient in the past week.
- 275 • **Prev\_Immediate Release Weak Opiates (IRWO) (N):** The number of types of immediate-  
276 release weak opiates used by the patient in the past week.
- 277 • **Prev\_Nonsteroidal Anti-inflammatory Drugs (NSAID) (N):** The number of types of  
278 nonsteroidal anti-inflammatory drugs used by the patient in the past week.
- 279 • **Prev\_Anticonvulsants/Antidepressants (A/A) (N):** The number of types of anticonvul-  
280 sants/antidepressants used by the patient in the past week.
- 281 • **Prev\_Others (N):** The number of other analgesics used by the patient in the past week,  
282 excluding ERSO, IRSO, ERWO, IRWO, NSAIDs, and A/A.
- 283 • **Opiate Tolerance (B):** Whether the patient has developed a decreased effect or reduced  
284 duration of action when using opiates for pain treatment.
- 285 • **Days of Medication Use (N):** The number of days the patient used opiates (calculated based  
286 on the highest level of opiates used if multiple types were used simultaneously).
- 287 • The following 9 items are from the Morisky Medication Adherence Scale (MMAS-8),  
288 including 8 questions and a total score:
  - 289 • **M1 (N):** Do you sometimes forget to take your medications?
  - 290 • **M2 (N):** People sometimes miss taking their medications for reasons other than forget-  
291 ting. Thinking over the past two weeks, were there any days when you did not take  
292 your medications?
  - 293 • **M3 (N):** Have you ever cut back or stopped taking your medications without telling  
294 your doctor because you felt worse when you took them?
  - 295 • **M4 (N):** When you travel or leave home, do you sometimes forget to bring along your  
296 medications?
  - 297 • **M5 (N):** Did you take all your medications yesterday?
  - 298 • **M6 (N):** When you feel like your symptoms are under control, do you sometimes stop  
299 taking your medications?
  - 300 • **M7 (N):** Taking medication every day is a real inconvenience for some people. Do you  
301 ever feel hassled about sticking to your treatment plan?
  - 302 • **M8 (N):** Do you have difficulty remembering to take all your medications?

- 303           • **MMAS-8 Total Score (N)**: The total score ranges from M1 to M8, with higher scores  
304           indicating better adherence to medication.
- 305       • **Duration of Analgesic Control (N)**: The duration of pain control after taking analgesics.
- 306       • **Constipation (B)**: Whether the patient experienced constipation as an adverse reaction after  
307       taking analgesics.
- 308       • **Nausea/Vomiting (B)**: Whether the patient experienced nausea or vomiting as an adverse  
309       reaction after taking analgesics.
- 310       • **Other Adverse Reactions (B)**: Whether the patient experienced other adverse reactions  
311       besides constipation and nausea/vomiting after taking analgesics.
- 312       • **Medication for Adverse Reactions (B)**: Whether the patient used medications to manage  
313       adverse reactions.

#### 314 **Evaluation of Previous Analgesic Treatment(5):**

- 315       1. The following 5 features are classified according to the Pharmaceutical Care Network Europe  
316       (PCNE) V8.0 classification of drug-related problems (DRPs):
  - 317           • **Drug-Related Problems (DRPs) (M)**: Any undesirable outcome or potential issue arising  
318           during the patient's drug therapy. This includes aspects of treatment effectiveness  
319           and safety.
  - 320           • **Causes (M)**: The underlying causes or factors leading to drug therapy problems.
  - 321           • **Interventions (M)**: Specific actions or measures taken to address drug therapy problems. These interventions can be implemented by pharmacists, doctors, or other  
322           healthcare professionals.
  - 323           • **Acceptance of Interventions (M)**: The patient's acceptance of the intervention plans  
324           proposed by healthcare professionals.
  - 325           • **Status of DRPs (M)**: The resolution status of DRPs after healthcare professionals' intervention.  
326             
327

#### 328 **Cancer Pain Medication Decision(9):**

- 329       • **ERSO\_Recommended (N\*)**: The number of extended-release strong opiates recommended  
330       by the doctor.
- 331       • **IRSO\_Recommended (N\*)**: The number of immediate-release strong opiates recommended  
332       by the doctor.
- 333       • **ERWO\_Recommended (N\*)**: The number of extended-release weak opiates recommended  
334       by the doctor.
- 335       • **IRWO\_Recommended (N\*)**: The number of immediate-release weak opiates recommended  
336       by the doctor.
- 337       • **NSAIDs\_Recommended (N\*)**: The number of nonsteroidal anti-inflammatory drugs recommended  
338       by the doctor.
- 339       • **A/A\_Recommended (N\*)**: The number of anticonvulsants/antidepressants recommended  
340       by the doctor.
- 341       • **Others\_Recommended (N\*)**: The number of other analgesics recommended by the doctor,  
342       excluding ERSO, IRSO, ERWO, IRWO, NSAIDs, and A/A.
- 343       • **Constipation Medication Recommended (M)**: The types of medication recommended by  
344       the doctor for managing constipation.
- 345       • **Nausea/Vomiting Medication Recommended (M)**: The types of medication recommended  
346       by the doctor for managing nausea and vomiting.

#### 347 **Follow-up(1):**



- **Pain Relief Status (M\*)**: The degree of pain relief experienced by the patient after using the analgesic regimen recommended by the doctor.

## 2.4 Label Statistics

Table 1: MR task: numerical labels

| Column       | Max | Min | Mean     | Missing Rate (%) |
|--------------|-----|-----|----------|------------------|
| ERSO_Recom   | 3   | 0   | 0.715502 | 0.0              |
| IRSO_Recom   | 2   | 0   | 0.232956 | 0.0              |
| ERWO_Recom   | 1   | 0   | 0.031155 | 0.0              |
| IRWO_Recom   | 1   | 0   | 0.095974 | 0.0              |
| NSAIDs_Recom | 3   | 0   | 0.293342 | 0.0              |
| A/A_Recom    | 2   | 0   | 0.043307 | 0.0              |
| Others_Recom | 2   | 0   | 0.001079 | 0.0              |

Table 2: TEA task: multi-classification labels

| Column             | Count  | Missing rate | Label 1 count | Label 2 count | Label 3 count | Label 4 count |
|--------------------|--------|--------------|---------------|---------------|---------------|---------------|
| Pain Relief Status | 30,932 | 27.43%       | 14,470        | 11,523        | 3,327         | 1,612         |

## 3 Data Statement for PEACE

### Curation Rationale

Description: The PEACE dataset was curated to facilitate research in pharmaceutical care for cancer pain management, with a specific focus on pain analgesia evaluation and medication decision-making. The dataset includes detailed patient information related to cancer pain management, encompassing demographics, clinical signs, medication details, physiological parameters, pain assessments, treatment outcomes, and follow-up information.

### Language Variety

Description: The dataset includes medical records and patient reports primarily in English. The original data was collected in Mandarin and has been professionally translated into English to facilitate broader accessibility and usability in research and clinical settings.

### Demographic

Description: The dataset contains demographic information of the patients, including their age and gender. The patients are primarily adults over the age of 18, with a balanced representation of genders.

### Annotator Demographic

Description: The annotation was performed by a team of medical professionals and data scientists, including both men and women from diverse ethnic backgrounds. The team comprised individuals aged 25 to 50, with representation from multiple ethnicities, ensuring a broad perspective in the annotation process. The annotators received extensive training in medical terminology and the specific requirements of the PEACE dataset, including guidelines on consistency and accuracy in annotation.

### Text Characteristics

Description: The dataset includes patient clinical information and follow-up records focusing on cancer pain management. The text covers a variety of topics, including patient demographics, clinical information, medication details, physiological parameters, pain assessment, treatment outcomes, and follow-up information. This comprehensive data collection allows for a thorough analysis of various aspects related to cancer pain and its management.

### Speech Situation

Description: Not applicable.

379 **Recording Quality (if applicable)**

380 Description: Not applicable.

## 381 **4 Data Card**

### 382 **4.1 Dataset Overview**

383 **Data Subject(s):** Cancer patients experiencing pain.

384 **Dataset Snapshot:** The PEACE dataset includes detailed pharmacological care records for over  
385 38,000 patients, covering demographics, clinical examination, treatment outcomes, medication plans,  
386 and patient self-perceptions.

387 **Content Description:** Records long-term and multiple follow-ups both inside and outside hospitals,  
388 includes patients' self-assessments of medication effects and the impact on their lives.

389 **Descriptive Statistics:** The dataset contains 103 features related to diverse pathologies, symptoms,  
390 and etiologies, with multi-visit, long-term observations for 2,600 patients.

**Dataset snapshot :** The snapshot of the dataset is shown in Table 3.

Table 3: Dataset snapshot

| Category                         | Data    |
|----------------------------------|---------|
| Size of Dataset                  | 10.9 MB |
| Number of Instances              | 38,766  |
| Number of Features               | 103     |
| Number of Fields                 | 7       |
| Labeled Classes (Classification) | 4       |

391

### 392 **4.2 Sensitivity of Data**

393 **Sensitivity Type(s):** Medical information

394 **Field(s) with Sensitive Data:** Patient demographics, medical history, medication details, and treat-  
395 ment outcomes.

396 **Security and Privacy Handling:** Data anonymization and privacy protection protocols are in place.  
397 Patient identifiers are removed, and dates are shifted to ensure privacy.

398 **Risk Type(s):** Data breaches, misuse of sensitive information.

399 **Supplemental Link(s):** PEACE dataset

400 **Risk(s) and Mitigation(s):** De-identification of patient data, secure data storage, and controlled  
401 access.

### 402 **4.3 Dataset Version and Maintenance**

403 **Version Details:** Version 1.0

404 **Maintenance Plan:** Updates based on new data and feedback.

405 **Expected Change(s):** Addition of new patient records and features.

### 406 **4.4 Example of Data Points**

407 **Primary Data Modality:** Structured tabular data.

408 **Sampling of Data Points:** Data points include demographics, clinical signs, medication details,  
409 physiological parameters, pain assessment, treatment outcomes, and follow-up information.

410 **Data Fields:** 103 features categorized into six groups.

#### 411 **4.5 Motivations & Intentions**

412 **Motivations:** To improve cancer pain management by providing comprehensive data for TEA and  
413 MR systems.

414 **Purpose(s):** Research in pharmaceutical care, machine learning model training for treatment assess-  
415 ment, and medication recommendation.

416 **Domain(s) of Application:** Cancer pain management, pharmacotherapy, clinical research.

417 **Motivating Factor(s):** Enhancing treatment effectiveness and patient quality of life.

418 **Intended Use:** Development of machine learning models for pain assessment and medication  
419 recommendations.

420 **Dataset Use(s):** Research, model training, clinical decision support.

421 **Suitable Use Case(s):** Studies on treatment efficacy, medication optimization, personalized medicine.

422 **Unsuitable Use Case(s):** Applications not related to cancer pain or pharmacological research.

423 **Research and Problem Space(s):** Pharmacotherapy for cancer pain, machine learning in healthcare.

424 **Citation Guidelines:** Please cite the PEACE dataset as follows: Dataset available at [https://](https://github.com/YTYTYD/PEACE)  
425 [github.com/YTYTYD/PEACE](https://github.com/YTYTYD/PEACE).

#### 426 **4.6 Provenance**

427 **Collection: Method(s) Used:** Clinical data collection, patient follow-ups.

428 **Methodology Detail(s):** Data anonymized, dates shifted, Delphi consensus method for feature  
429 selection.

430 **Source Description(s):** Hospital records, patient self-reports.

431 **Collection Cadence:** Continuous.

432 **Data Integration:** Combined hospital and follow-up data.

433 **Data Processing:** Standardization, imputation, and categorization of features.

434 **Collection Criteria: Data Selection:** Patients with definitive cancer diagnoses and associated pain.

435 **Data Inclusion:** Comprehensive medical records and follow-up reports.

436 **Data Exclusion:** Incomplete records or patients under 18 years.

437 **Relationship to Source: Use & Utility(ies):** Enables detailed analysis of cancer pain management  
438 and medication efficacy.

439 **Benefit and Value(s):** Supports research in personalized medicine and treatment optimization.

440 **Limitation(s) and Trade-Off(s):** Limited to cancer pain, potential biases from a single regional  
441 source.

#### 442 **4.7 Annotations & Labeling**

443 **Annotation Workforce Type:** Medical professionals.

444 **Annotation Characteristic(s):** Detailed annotations by clinical experts.

445 **Annotation Description(s):** Includes medical diagnoses, treatment outcomes, and patient-reported  
446 symptoms.

447 **Annotation Distribution(s):** Across all patient records.

448 **Annotation Task(s):** Annotation of clinical features and patient follow-up reports.  
449 **Human Annotators: Annotator Description(s):** Clinical pharmacists, anesthetists, oncologists, and  
450 nurses.  
451 **Annotator Task(s):** Assessing treatment outcomes and medication plans.  
452 **Language(s):** Mandarin (translated to English for documentation).  
453 **Location(s):** Xiangya Hospital and affiliated follow-up platform.  
454 **Gender(s):** Both male and female annotators.

#### 455 **4.8 Human and Other Sensitive Attributes**

456 **Sensitive Human Attribute(s):** Health status, pain levels, medication details.  
457 **Intentionality:** Required for accurate pain and treatment assessment.  
458 **Rationale:** Critical for understanding treatment efficacy and patient well-being.  
459 **Source(s):** Clinical and self-reported data.  
460 **Known Correlations:** Pain levels and medication efficacy, patient demographics and treatment  
461 outcomes.  
462 **Risk(s) and Mitigation(s):** Privacy risks mitigated through data anonymization and secure storage.

#### 463 **4.9 Validation Types**

464 **Method(s):** Expert consensus and Delphi method.  
465 **Breakdown(s):** Multiple rounds of expert surveys to refine features.  
466 **Description(s):** Features validated through structured communication and agreement among experts.  
467 **Description of Human Validators: Characteristic(s):** Experienced clinicians and pharmacists.  
468 **Description(s):** Experts in cancer pain management.  
469 **Language(s):** Mandarin.  
470 **Gender(s):** Both male and female validators.

#### 471 **4.10 Sampling Methods**

472 **Method(s) Used:** Judgmental sampling and expert consensus.  
473 **Characteristic(s):** Targeted selection of experts and comprehensive patient data.  
474 **Sampling Criteria:** Inclusion of patients with complete medical records and definitive cancer  
475 diagnoses.

#### 476 **4.11 Known Applications & Benchmarks**

477 **ML Application(s):** TEA (classification) and MR (regression) systems.  
478 **Evaluation Result(s):** Validated the efficacy of 13 machine learning models.  
479 **Evaluation Process(es):** Experiments with 5-fold cross-validation and independent test sets.  
480 **Description(s) and Statistic(s):** Detailed performance metrics in the experiment section.  
481 **Expected Performance and Known Caveats:** Tree-based models perform effectively, while neural  
482 network models demand specialized tuning.

#### 483 **4.12 Use in ML or AI Systems**

484 **Dataset Use(s):** Training models for cancer pain treatment assessment and medication recommenda-  
485 tion.

486 **Notable Feature(s):** Long-term follow-up, comprehensive patient assessments.

487 **Usage Guideline(s):** We release the PEACE dataset under a CC-BY license. The access process for  
488 the dataset involves three steps:

- 489 1. Complete some training and provide certification (such as the CITI or GCP certification).
- 490 2. Carefully read the terms of the Data Use Agreement and if you agree and wish to proceed,  
491 send your application to the manager. Please use an official email address (such as .edu).
- 492 3. Final approval of data access is required by Xiangya Hospital

493 Once an application has been approved, the researcher will receive emails containing instructions  
494 for downloading the dataset. Any model trained on this dataset should not be deployed in real-  
495 world systems until its performance has been rigorously evaluated and the system's scope and  
496 representativeness in relation to real-world applications have been validated. The use of data must  
497 strictly comply with relevant regulations in China. Access to the PEACE dataset can be found at the  
498 following address:[<https://github.com/YTYTYD/PEACE>].

499 **Distribution(s):** Controlled access via GitHub repository.

500 **Known Correlation(s):** Patient demographics and treatment outcomes.

501 **Split Statistics:** 80% training, 20% testing.

#### 502 **4.13 Terms of Art**

503 **Concepts and Definitions:** TEA: Treatment Effectiveness Assessment.

504 MR: Medication Recommendation.

505 MDT: Multidisciplinary Treatment.

506 NRS: Numerical Rating Scale.

#### 507 **4.14 Reflections on Data**

508 **Any additional information not captured by the data card:** The dataset aims to fill gaps in existing  
509 cancer pain datasets by including multidisciplinary assessments and long-term follow-ups.

#### 510 **4.15 Access Retention & Wipeout**

511 **Access:** **Access Type:** Restricted, for research purposes.

512 **Documentation Link(s):** PEACE dataset.

513 **Prerequisite(s):** 1) Complete relevant training, 2) Agree to the data usage agreement, 3) Obtain  
514 approval from Xiangya Hospital.

515 **Policy Link(s):** Included in the data use agreement.

516 **Access Control List(s):** Managed by the dataset maintainers and Xiangya hospital.

517 **Retention:** **Duration:** Long-term.

518 **Policy Summary:** Data retained for ongoing research and updates.

519 **Process Guide:** Data use agreement outlines retention policies.

520 **Exception(s) and Exemption(s):** As specified in the data use agreement.

521 **Wipeout and Deletion:** **Duration:** As needed based on ethical guidelines.

522 **Deletion Event Summary:** Deletion upon request or end of research period.

523 **Acceptable Means of Deletion:** Secure deletion protocols.

524 **Post-Deletion Obligations:** Ensure no residual data remains.

525 **Operational Requirement(s):** Compliance with institutional guidelines.

526 **Exceptions and Exemptions:** None specified.

## 527 **5 Accountability Frameworks**

### 528 **5.1 Dataset Requirements Specification**

#### 529 **Name of Dataset:**

530 PEACE: Pharmaceuticals for easing cancer pain with care

#### 531 **Owner:**

532 Developed by a collaborative effort from multiple research groups.

533 Funding provided by The Fundamental Research Funds for the Central South University.

#### 534 **Vision:**

535 Vision 1.0

#### 536 **Motivation:**

537 The dataset was created to improve cancer pain management by filling gaps in existing data. It  
538 focuses on long-term follow-ups, MDT assessments, and patient self-reports on medication effects  
539 and impacts.

#### 540 **Intended uses:**

541 Specific uses include advancing cancer pain medication research, improving cancer pain management,  
542 and facilitating comprehensive data collection for various related analyses.

#### 543 **Non-intended uses:**

544 The dataset should not be used for purposes outside the scope of cancer pain management and related  
545 research without proper context and understanding of its limitations.

#### 546 **Related documents:**

- 547 • All\_Data.csv: a .CSV file containing all patients in the dataset, with patient ID.
- 548 • All\_data.json: a .JSON file describing all the data in the dataset.
- 549 • D\_Numerical.csv: A .csv file containing the units of the numerical features.
- 550 • D\_Multiclass.csv: A .csv file containing the meaning of multiclass features.
- 551 • D\_Diagnosis.csv: A .csv file containing the meaning of diagnosis.
- 552 • Train data: a .CSV file containing the training set of patients.
- 553 • Test data: a .CSV file containing the test set of patients.

#### 554 **Stakeholders consulted:**

555 Clinical staff, including doctors, nurses, and pharmacists, were involved in the data collection process.

#### 556 **Creation requirements:**

557 Data was collected from hospital and an online follow-up platform.

558 Manual curation by clinical staff.

559 The data spans multiple years and includes comprehensive patient information.

#### 560 **Instance requirements:**

561 The dataset includes demographic data, clinical signs, medication details, physiological parameters,  
562 treatment outcomes, pain assessments, and follow-up data.

563 There are 103 features from more than 38,000 patients.  
564 Data is a sample selected based on inclusion and exclusion criteria.

565 **Distributional requirements:**  
566 The dataset should represent a comprehensive range of patient information and ensure the inclusion  
567 of diverse patient demographics and conditions.

568 **Data processing requirements:**  
569 Deep de-identification and privacy protection processing.  
570 Extensive preprocessing, cleaning, and labeling were performed.  
571 Issues like disorganization, duplicate records, and missing information were addressed.  
572 Standardization and merging of useful fields from duplicate records were done to enhance data  
573 quality.

574 **Performance requirements:**  
575 Medical related users can expect high-quality data suitable for advancing cancer pain medication  
576 research and improving cancer pain management practices. Users of machine learning can look for-  
577 ward to new data sources and baselines for recommended treatment effect assessment and medication  
578 recommendation systems.

579 **Maintenance requirements:**  
580 Data should be regularly updated to maintain its relevance and accuracy. The frequency and duration  
581 of updates depend on ongoing research and clinical needs.

582 **Sharing requirements:**  
583 We release the PEACE dataset under a CC-BY license. We ask that users proactively complete human  
584 subjects research training and adhere to a data use agreement that requires responsible data handling  
585 and compliance with collaborative research principles. Data access is required to be reviewed by  
586 Xiangya Hospital.

587 **Caveats and risks:**  
588 The dataset includes de-identified sensitive health information, and measures were taken to ensure data  
589 privacy and security. Users should handle the data responsibly to avoid misuse. Any model trained on  
590 this dataset should not be deployed in real-world systems until its performance has been rigorously  
591 evaluated and the system's scope and representativeness in relation to real-world applications have  
592 been validated.

593 **Data ethics:**  
594 Ethical review and approvals were conducted. Informed consent was obtained from patients, and data  
595 was de-identified to comply with privacy regulations.

## 596 **5.2 Design Document**

597 **Name of Dataset:**  
598 PEACE: Pharmaceuticals for easing cancer pain with care

599 **Owner:**  
600 Developed by a collaborative effort from multiple research groups.  
601 Funding provided by The Fundamental Research Funds for the Central South University.

602 **Primary Data Type(s):**  
603 Numerical data, Binary Data, Multiclass data

604 **Data Content:**  
605 It includes basic patient information, comprehensive pain assessment, previous analgesic treatment  
606 and evaluation, cancer pain medication decision-making, monitoring and management of adverse  
607 reactions, and pain relief assessment.

608 **Objective:**  
609 This research aims to improve cancer pain medication and management by addressing data gaps. The

610 dataset offers a comprehensive view, including patient perspectives and multidisciplinary treatment  
611 evaluations.

612 **Background:**

613 Cancer pain is a common symptom among cancer patients, with an incidence rate of up to 53%. This  
614 greatly affects patients' quality of life and may impede effective cancer treatment. Pharmacotherapy,  
615 the mainstay of cancer pain management, often involves long-term medication use. Physicians must  
616 continually assess the efficacy of the current analgesic regimen by considering factors such as the  
617 patient's physical condition, pain intensity, type of pain, and prior medications. This enables targeted  
618 adjustments to the treatment plan to improve therapeutic outcomes.

619 **Sources:**

620 The data is sourced from hospital records and an online follow-up platform. It includes a broad  
621 range of patient information such as demographics, clinical signs, medication details, physiological  
622 parameters, treatment outcomes, pain assessments, adverse drug reactions, and dynamic adjustments  
623 to medication.

624 **Annotations:**

625 Our data construction process resulted in a comprehensive dataset encompassing 103 features, broadly  
626 categorized into six groups. The Patient Baseline Information group (50 features) captures demo-  
627 graphic and clinical characteristics of the patients, potentially including age, gender, co-morbidities,  
628 and disease stage. The Comprehensive Pain Assessment group (15 features) details the extent and  
629 characteristics of the patients' pain experience, potentially including pain intensity scores, pain quality  
630 descriptors (e.g., visceral pain, somatic pain), and functional limitations. The Previous Analgesic  
631 Treatment group (23 features) details the medications and interventions previously used to manage  
632 the patients' pain, potentially including medication names, dosages, durations, and routes of adminis-  
633 tration. The Evaluation of Previous Analgesic Treatment group (5 features) captures the effectiveness  
634 and tolerability of prior pain management strategies, potentially including patient-reported outcomes  
635 or physician assessments. The Cancer Pain Medication Decision group (9 features) details the ratio-  
636 nale behind the selection of specific pain medications for the study participants, potentially including  
637 factors like pain type, treatment history, and co-morbidities. The Follow-Up group (1 feature) captures  
638 information on patient outcomes after the intervention of interest, potentially including pain response  
639 or adverse events. The labels of the dataset include 7 categories of medication recommendations  
640 (regression) and treatment effect evaluation (classification).

641 **Data Quality:**

642 Data quality is ensured through expert consultation, the removal of data points to prevent model bias,  
643 merging of useful fields from duplicate records, and categorizing features to enhance usability in  
644 machine learning tasks.

645 **Characteristics:**

646 Expected Characteristics: The dataset includes 103 features from over 38,000 patients. Relationships  
647 are made explicit through linkages between patient records and treatment outcomes, pain assessments,  
648 and follow-up data.

649 Population: The population represented includes patients with a definitive cancer diagnosis and pain.

650 **Privacy Handling:**

651 Privacy is handled by de-identifying all sensitive health information to comply with privacy regula-  
652 tions.

653 **Maintenance:**

654 The dataset is maintained internally at Xiangya Hospital. Issues are addressed as they arise.

655 **Sharing:**

656 The dataset will be shared for research purposes, with access controlled and data de-identified to  
657 ensure privacy.



### **Caveats:**

Known caveats include some errors, sources of noise, and redundancies due to human errors. These have been addressed through expert consultation and preprocessing steps.

### **Data Ethics:**

Ethical considerations include obtaining informed consent from patients, ethical review and approval by the Institutional Review Board of Xiangya Hospital, and de-identification of data to protect patient privacy.

### **Related Datasets:**

To build reliable TEA and MR systems, it is crucial to gather comprehensive data on both inpatients and outpatients. This includes medication details, treatment outcomes, adverse events and their etiologies, treatment adjustments, and impact on patients' quality of life. However, no public dataset currently meets all these requirements comprehensively. Widely used datasets such as MIMIC-III [2] and MIMIC-IV [1], while detailed in recording medication specifics, lack pharmacist assessments of treatment outcomes. These datasets primarily focus on single hospitalization events rather than the long-term health status of patients, which is particularly disadvantageous for managing chronic conditions like cancer pain. Similarly, the eICU Collaborative Research Database [5] documents essential medication usage information but fails to provide clear explanations of medication effects and lacks long-term patient follow-up. Additionally, these datasets lack patient feedback on their treatment plans. SEER [6] is a representative large-scale cancer registry databases in the United States, compiling extensive retrospective clinical data. It primarily focuses on the treatment processes of cancer patients but does not include assessments of medication plans following hospital discharge. For medication effect assessment, the SIDER [3] database lists adverse reactions for marketed drugs, while the FAERS [8] and TwoSIDES [7] datasets record potential drug interactions. Although these datasets are useful in some aspects, they generally lack detailed records of patients' conditions and necessary clinical features, limiting their practical utility. ISS[4] is a cancer pain assessment dataset that includes videos of 29 patients, along with their self-reported pain scale scores, used to predict the patients' pain levels. A common shortfall of these datasets is their inability to continuously observe and assess patient conditions. They often describe data from a single perspective and fail to integrate the diverse characteristics needed for making MDT decisions. The following section details the PEACE dataset and the steps taken to construct it, aiming to address the deficiencies of existing datasets.

## **5.3 Dataset Testing Report**

**Name of Dataset:** PEACE: Pharmaceuticals for easing cancer pain with care

### **5.3.1 Summary**

#### **What is being tested?**

We developed the PEACE dataset, a comprehensive resource specifically designed for the construction of treatment effectiveness assessment (TEA) and medication recommendation (MR) systems for cancer pain. The testing focuses on the following aspects:

- TEA, which is a multi-label classification (levels 1-4) using patient characteristics with time series data to quantify levels of treatment efficacy.
- MR, which involves regression analyses utilizing time series data to predict the quantity of various analgesics required by patients following adjustments in their treatment plans based on their medication history.

### **5.3.2 Testing Metrics**

We used the following metrics to evaluate the performance. For TEA (classification tasks), we used the metrics of accuracy (ACC), area under the receiver operating characteristic curve (AUROC), F1

score, recall, and precision. For MR (regression tasks), we used mean squared error (MSE) and mean absolute error (MAE).

### 5.3.3 Meta-Testing

#### Is the data still needed?

Yes, the data is essential for ongoing cancer pain management research, improving treatment outcomes, and developing new pharmaceutical care strategies.

#### Are the data requirements still relevant and up-to-date?

Yes, the data requirements remain relevant and are up-to-date, addressing current research needs.

### 5.3.4 Requirements Testing

Table 4: Requirements Testing

| Requirement from requirements specification | Score or Results | Justification of the results or a link to artifact                                                          |
|---------------------------------------------|------------------|-------------------------------------------------------------------------------------------------------------|
| Multi-label classification for TEA          | Met              | Time series data is used to classify treatment efficacy levels (1-4) based on patient characteristics       |
| Regression analysis for MR                  | Met              | Time series data is utilized to predict the quantity of analgesics required, considering medication history |

Table 5: Untested Requirements

| Untested Requirement | Reason for not testing            |
|----------------------|-----------------------------------|
| None                 | All requirements have been tested |

## References

- [1] A. E. Johnson, L. Bulgarelli, L. Shen, A. Gayles, A. Shammout, S. Horng, T. J. Pollard, S. Hao, B. Moody, B. Gow, et al. Mimic-iv, a freely accessible electronic health record dataset. *Scientific data*, 10(1):1, 2023.
- [2] A. E. Johnson, T. J. Pollard, L. Shen, L.-w. H. Lehman, M. Feng, M. Ghassemi, B. Moody, P. Szolovits, L. Anthony Celi, and R. G. Mark. Mimic-iii, a freely accessible critical care database. *Scientific data*, 3(1):1–9, 2016.
- [3] M. Kuhn, I. Letunic, L. J. Jensen, and P. Bork. The sider database of drugs and side effects. *Nucleic acids research*, 44(D1):D1075–D1079, 2016.
- [4] C. Ordun. Intelligent sight and sound: A chronic cancer facial pain dataset. In *Thirty-fifth Conference on Neural Information Processing Systems Datasets and Benchmarks Track*, 2021.
- [5] T. J. Pollard, A. E. Johnson, J. D. Raffa, L. A. Celi, R. G. Mark, and O. Badawi. The eicu collaborative research database, a freely available multi-center database for critical care research. *Scientific data*, 5(1):1–13, 2018.
- [6] Surveillance, Epidemiology, and End Results (SEER) Program. Seer\*stat database: Incidence - seer 18 regs research data, nov 2021 sub (1975-2019) - linked to county attributes - time dependent (1990-2019) income/rurality, 1969-2019 counties, 2022. National Cancer Institute, DCCPS, Surveillance Research Program, released April 2022, based on the November 2021 submission. Available at: <https://seer.cancer.gov/>.
- [7] N. P. Tatonetti, P. P. Ye, R. Daneshjou, and R. B. Altman. Data-driven prediction of drug effects and interactions. *Science translational medicine*, 4(125):125ra31–125ra31, 2012.
- [8] U.S. Food and Drug Administration. Fda adverse event reporting system (faers) public dashboard. <https://fis.fda.gov/extensions/FPD-QDE-FAERS/FPD-QDE-FAERS.html>, 2024. Accessed on 2024-05-09.
