# Supplementary material
Source: ML conference proceedings conference paper supplement (https://openreview.net/forum?id=dBSoa8fpV7)
Supplement: supplementary_material [file attachment]

## 434 A Online Follow-up Platform

435 As illustrated in Figure 3, the cancer pain online follow-up platform allows patients to proactively  
 436 report their condition after hospital discharge. Given that our system operates in a non-English  
 437 environment, we have translated its pages into English to ensure readability and comprehension.

**Pain Assessment**

1. Please list the numbers corresponding to the areas where you experience the most pain on the line below (separate the numbers with commas; multiple selections are permitted).

8,23

Left Right Left Right

13 14 15 16 17 18 19 20 21 22 23 24 25 26 27 28 29 30 31 32

**Medication Task**

Incomplete Completed Expired

Pain management -> Titration 2022-10-26 08:30:00 >

Pain management -> Assessment 2022-10-25 11:10:59 >

Pain management -> Application 2022-10-25 09:45:13 >

PLAN TASK MY PROFILE

**24-Hour Pain Assessment**

1. Pain medication usage from 8:00 AM yesterday to 8:00 AM today (template provided below)

| Medication Time(hour) | Dosage(mg) |            |
|-----------------------|------------|------------|
|                       | Oxycodone  | Gabapentin |
| -8:00                 | 10         | 300        |
| -16:00                | 10         | 300        |
| -20:00                | 10         | 300        |
| 8:00                  | 10         | 300        |

| Medication Time(hour) | Oxycodone (mg) | Gabapentin (mg) | Other 1 |
|-----------------------|----------------|-----------------|---------|
|                       |                |                 |         |
|                       |                |                 |         |
|                       |                |                 |         |

**Monthly Health Assessment**

We would like to learn more about your health. Please personally answer all the questions below. There are no 'right' or 'wrong' answers; simply check the option that best reflects your situation.

1. Do you have difficulty engaging in strenuous activities, such as carrying heavy shopping bags or suitcases?

☐ None ☐ A Little ☐ Moderate ☐ Severe

2. Do you have difficulty walking long distances?

☐ None ☐ A Little ☐ Moderate ☐ Severe

3. Do you have difficulty walking short distances outdoors?

☐ None ☐ A Little ☐ Moderate ☐ Severe

4. Do you need to stay in bed or sit in a chair during the day?

☐ None ☐ A Little ☐ Moderate ☐ Severe

**Biweekly Medication Adherence**

1. Have you missed taking your pain medication on time?

☐ YES ☐ NO

2. In the past two weeks, have you missed taking your pain medication?

☐ YES ☐ NO

3. Have you ever increased or decreased your pain medication dosage without informing your doctor or pharmacist?

☐ YES ☐ NO

4. Have you ever forgotten to bring your pain medication when traveling or leaving home?

☐ YES ☐ NO

5. Did you take your pain medication yesterday?

☐ YES ☐ NO

6. Did you take your pain medication yesterday?

☐ YES ☐ NO

**Patient Messaging**

Send Message

Please enter your message

Pain Management Group

Search Patients

Send Message

TASK PATIENTS MESSAGE MY PROFILE

Figure 3: Functions of the cancer pain online follow-up platform (English translation version)

## 438 B Delphi Process Design

### 439 B.1 Process Design

440 In each round of the Delphi survey, experts were asked to rate each item using a five-point Likert  
 441 scale (ranging from strongly agree, agree, neutral, disagree, to strongly disagree). Consensus was  
 442 defined as: 1) an average score of  $\geq 4.0$ ; 2) a coefficient of variation  $<0.15$ ; and 3) no dissenting  
 443 opinions. Additionally, experts were required to self-assess their authority (Cr) for each round,  
 444 determined by the judgement criteria (Ca) and their familiarity with the clinical issues (Cs). The Ca  
 445 encompassed four dimensions: work experience, theoretical analysis, understanding from domestic  
 446 and international peers, and insights. The Cs included five levels: very familiar, familiar, somewhat  
 447 familiar, unfamiliar, and very unfamiliar, quantified as 1.0, 0.8, 0.6, 0.4, and 0.2, respectively. Both  
 448 rounds of questionnaires will calculate the experts' coordination coefficient (W) and response rate,  
 449 with a response rate of 75% or above considered satisfactory. The questionnaires were distributed to  
 450 experts via email. To ensure a high response rate, each Delphi round was open for two weeks, with  
 451 email reminders sent at the start and end of each round.

452 The expert response rate was calculated as follows:

$$\text{Expert Coefficient} = \left( \frac{\text{Number of returned questionnaires}}{\text{Number of distributed questionnaires}} \right) \times 100\% \quad (1)$$

453 The coordination ratio  $Cr$  was calculated using:

$$Cr = \frac{Ca + Cs}{2} \quad (2)$$

454 The experts' opinion coordination coefficient ( $W$ ) was represented by Kendall's  $W$ , with differences  
455 assessed using the Chi-square ( $\chi^2$ ) test. A  $p$ -value of less than 0.05 was considered statistically  
456 significant.

## 457 B.2 Expert Invitation

458 A total of 32 experts from nine provinces in China were invited to participate in this study, including  
459 16 pharmacists, 4 anesthetists, 4 oncologists, and 8 nurses. All experts are employed at top-tier  
460 hospitals in China. Detailed demographic information of the experts is provided in Table 6.

Table 6: Baseline characteristics of the experts

| Characteristic                                      | N  | %    |
|-----------------------------------------------------|----|------|
| <b>Gender</b>                                       |    |      |
| Male                                                | 6  | 18.6 |
| Female                                              | 26 | 81.4 |
| <b>Age</b>                                          |    |      |
| 30-39                                               | 10 | 31.3 |
| 40-49                                               | 16 | 50.0 |
| $\geq 50$                                           | 6  | 18.7 |
| <b>Profession</b>                                   |    |      |
| Pharmacist                                          | 16 | 50.0 |
| Anaesthetists                                       | 4  | 12.5 |
| Oncologists                                         | 4  | 12.5 |
| Nurse                                               | 8  | 25.0 |
| <b>Professional title</b>                           |    |      |
| Director                                            | 9  | 28.1 |
| Associate director                                  | 23 | 71.9 |
| <b>Highest level of education</b>                   |    |      |
| Bachelor degree                                     | 9  | 28.1 |
| Master degree                                       | 12 | 37.5 |
| Doctoral degree                                     | 11 | 34.4 |
| <b>Experience in cancer pain management (years)</b> |    |      |
| 5-9                                                 | 13 | 40.6 |
| 10-19                                               | 14 | 43.8 |
| 20-29                                               | 3  | 9.4  |
| $\geq 30$                                           | 2  | 6.2  |

## 461 B.3 First Round Delphi

462 In the first round of the Delphi survey, experts were invited to rate 21 items across 6 themes, as  
463 shown in Table 7(Clinical features of the first round). All items were rated as "Agree" or "Strongly  
464 Agree," with an average score of  $\geq 4.0$ . In this round, consensus was reached for 17 items (80.9%)  
465 submitted to the expert panel. Specifically, 5 items from Theme A, 5 items from Theme B, 4 items  
466 from Theme C, and all items from Themes D, E, and F achieved consensus. Items A3 (Smoking  
467 history, alcohol consumption history, allergic history), B6-1 (Worsening factors, including activities,

468 weather, and mental factors), B6-2 (Alleviating factors, including rest, suitable environment, and  
469 taking analgesics), and C2 (Duration of analgesics use) did not meet the inclusion criteria for the  
470 coefficient of variation and will thus proceed to the second round.

471 Additionally, three supplementary items submitted by the experts will be included in the second round:  
472 O1 (Monitoring and management of analgesic-related adverse reactions), O2 (Patient lifestyle), and  
473 O3 (Drug accessibility).

474 **B.4 Second Round Delphi**

475 Based on the results of the first round of evaluations, the new questionnaire includes 7 items. In this  
476 round, consensus was achieved for 3 items (42.8%) submitted to the expert panel. Items A3, C2, and  
477 the newly introduced item O1 were included, while the other items were excluded. The results of the  
478 second round are shown in Table 7(Clinical features of the second round).

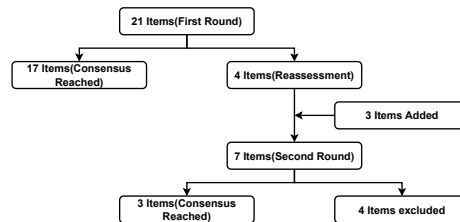

Figure 4: Overview of the Delphi rounds

Table 7: Clinical features of the first and second round

| Clinical features of the first round                       |                                                                                                                                         |               |                              |                   |
|------------------------------------------------------------|-----------------------------------------------------------------------------------------------------------------------------------------|---------------|------------------------------|-------------------|
| NO                                                         | Clinical Features                                                                                                                       | Average score | Coefficient of variation (%) | Reach a consensus |
| <b>Theme A: Patient Basic Information</b>                  |                                                                                                                                         |               |                              |                   |
| A1                                                         | Patient general information and clinical diagnosis                                                                                      | 4.50          | 13.83                        | YES               |
| A2                                                         | Laboratory examination (including complete blood count, liver function, kidney function)                                                | 4.25          | 13.36                        | YES               |
| A3                                                         | Smoking history, alcohol consumption history, allergic history                                                                          | 4.34          | 19.05                        | NO                |
| A4                                                         | Tumor-related treatment                                                                                                                 | 4.65          | 12.95                        | YES               |
| A5                                                         | Performance status                                                                                                                      | 4.09          | 11.37                        | YES               |
| A6                                                         | Analgesic risk assessment                                                                                                               | 4.71          | 14.48                        | YES               |
| <b>Theme B: Comprehensive pain assessment</b>              |                                                                                                                                         |               |                              |                   |
| B1                                                         | Pain type                                                                                                                               | 4.62          | 11.97                        | YES               |
| B2                                                         | Pain intensity, assessed by quantitative tools                                                                                          | 4.78          | 10.27                        | YES               |
| B3                                                         | Pain frequency                                                                                                                          | 4.56          | 11.05                        | YES               |
| B4                                                         | Breakthrough pain assessment                                                                                                            | 4.59          | 14.48                        | YES               |
| B5                                                         | Impact of pain on daily life                                                                                                            | 4.43          | 13.95                        | YES               |
| B6                                                         | Pain worsening or alleviating factors                                                                                                   |               |                              |                   |
| B6-1                                                       | Worsening factors, including activities, weather, and mental factors                                                                    | 4.37          | 17.17                        | NO                |
| B6-2                                                       | Alleviating factors, including rest, suitable environment, and taking analgesics                                                        | 4.15          | 20.37                        | NO                |
| <b>Theme C: Previous analgesic treatment</b>               |                                                                                                                                         |               |                              |                   |
| C1                                                         | Types of analgesics                                                                                                                     | 4.81          | 8.24                         | YES               |
| C2                                                         | Duration of analgesics use                                                                                                              | 4.31          | 19.03                        | NO                |
| C3                                                         | Opioid tolerance                                                                                                                        | 4.59          | 13.38                        | YES               |
| C4                                                         | Medication adherence                                                                                                                    | 4.46          | 13.90                        | YES               |
| C5                                                         | Analgesic efficacy assessment                                                                                                           | 4.28          | 14.81                        | YES               |
| <b>Theme D: Evaluation of previous analgesic treatment</b> |                                                                                                                                         |               |                              |                   |
| D1                                                         | Including analysis of existing/potential Drug-Related Problems (DRPs), their causes, interventions, and outcomes in previous medication | 4.62          | 14.27                        | YES               |
| <b>Theme E: Cancer Pain Medication Decision</b>            |                                                                                                                                         |               |                              |                   |
| E1                                                         | Cancer pain medication decision based on comprehensive pain assessment                                                                  | 4.84          | 7.62                         | YES               |
| <b>Theme F: Follow-up</b>                                  |                                                                                                                                         |               |                              |                   |
| F1                                                         | Pain relief assessment                                                                                                                  | 4.71          | 11.08                        | YES               |
| Clinical features of the second round                      |                                                                                                                                         |               |                              |                   |
| NO                                                         | Clinical Features                                                                                                                       | Average score | Coefficient of variation (%) | Reach a consensus |
| <b>Theme A3</b>                                            |                                                                                                                                         |               |                              |                   |
|                                                            | Smoking history, alcohol consumption history, allergic history                                                                          | 4.15          | 12.39                        | YES               |
| <b>Theme B6-1</b>                                          |                                                                                                                                         |               |                              |                   |
|                                                            | Worsening factors, including activities, weather, and mental factors                                                                    | 4.21          | 16.74                        | NO                |
| <b>Theme B6-2</b>                                          |                                                                                                                                         |               |                              |                   |
|                                                            | Alleviating factors, including rest, suitable environment, and taking analgesics                                                        | 4.25          | 17.93                        | NO                |
| <b>Theme C2</b>                                            |                                                                                                                                         |               |                              |                   |
|                                                            | Duration of analgesics use                                                                                                              | 4.68          | 13.75                        | YES               |
| <b>Other O1</b>                                            |                                                                                                                                         |               |                              |                   |
|                                                            | Monitoring and management of analgesic-related adverse reactions                                                                        | 4.84          | 9.25                         | YES               |
| <b>Other O2</b>                                            |                                                                                                                                         |               |                              |                   |
|                                                            | Drug accessibility                                                                                                                      | 4.12          | 22.83                        | NO                |
| <b>Other O3</b>                                            |                                                                                                                                         |               |                              |                   |
|                                                            | Lifestyle of patients                                                                                                                   | 4.25          | 19.82                        | NO                |

The response rate for both rounds was 100% (32/32). In both rounds of the Delphi survey, the mean familiarity score (Cs), the mean judgment criteria score (Ca), and the mean authority coefficient (Cr) of the experts were all greater than 0.70 (Tables 8 and 9). The coordination coefficient (W) of the experts' opinions was 0.195 in the first round and 0.250 in the second round. The  $\chi^2$  test indicated that the coordination of expert opinions was significant ( $p < 0.05$ ), suggesting that the experts' opinions were well-coordinated and the results are reliable (Table 10).

Table 8: Expert authority coefficient (Cr) in the first round

| Themes                                     | Cs   | Ca   | Cr   |
|--------------------------------------------|------|------|------|
| Patient Basic Information                  | 0.79 | 0.86 | 0.82 |
| Comprehensive Pain Assessment              | 0.87 | 0.87 | 0.87 |
| Previous Analgesic Treatment               | 0.83 | 0.80 | 0.81 |
| Evaluation of Previous Analgesic Treatment | 0.76 | 0.83 | 0.79 |
| Cancer Pain Medication Decision            | 0.76 | 0.85 | 0.80 |
| Follow-up                                  | 0.88 | 0.93 | 0.90 |

Table 9: Expert authority coefficient (Cr) in the second round

| Themes                                                           | Cs   | Ca   | Cr   |
|------------------------------------------------------------------|------|------|------|
| Patient Basic Information                                        | 0.83 | 0.88 | 0.85 |
| Comprehensive pain assessment                                    | 0.87 | 0.86 | 0.86 |
| Previous analgesic treatment                                     | 0.81 | 0.78 | 0.79 |
| Monitoring and management of analgesic-related adverse reactions | 0.87 | 0.90 | 0.88 |
| Drug accessibility                                               | 0.77 | 0.82 | 0.79 |
| Lifestyle of patients                                            | 0.91 | 0.80 | 0.85 |

Table 10: Coefficient of concordance (W) of experts in each round

| Delphi round | Items | W     | $\chi^2$ | P      |
|--------------|-------|-------|----------|--------|
| Round 1      | 21    | 0.195 | 126.779  | <0.001 |
| Round 2      | 7     | 0.250 | 54.163   | 0.006  |

As shown in Figure 4, consensus was reached on 20 feature items over two rounds of the Delphi process. From these 20 items, a total of 103 sub-items were included as features, covering six areas: basic patient information, comprehensive pain assessment, previous analgesic treatment and evaluation, cancer pain medication decision-making, monitoring and management of adverse reactions, and pain relief assessment.

## B.5 Feature Description

Patients in the PEACE dataset have the following features (for data type, B: Binary, N: Numeric, M: Multiclass, \*: Label):

### Patient Basic Information(50)

#### 1. Demographics

- **ID (N)**: A unique random identification number assigned to each patient.
- **Gender (B)**: The gender of the patient.
- **Age (N)**: The age of the patient.
- **Height (N)**: The height of the patient.
- **Weight (N)**: The weight of the patient.
- **BMI (N)**: A common indicator for assessing body fat, calculated using weight and height.

- **Body Surface Area (BSA) (N):** The total surface area of the human body.
- **Medical Record Date (N):** The date on which the doctor makes a decision regarding cancer pain medication treatment based on a comprehensive pain assessment.
- **Length of Hospital Stay (N):** The duration of the patient's stay during the current hospital visit, measured in days.
- **Number of Hospital Admissions (N):** The total number of times the patient has been hospitalized due to tumour diseases.
- **Diagnosis (M):** The diagnosis provided by the doctor at the time of discharge, only including tumour-related diseases.
- **Smoking History (B):** Whether the patient has a history of smoking continuously for 6 months or more.
- **Drinking History (B):** Whether the patient has a history of drinking alcohol at least once a week for 6 months or more.
- **Allergy History (B):** Whether the patient has experienced allergic reactions.
- **Tumour Treatment Methods (M):** The methods of tumour treatment, including surgery, chemotherapy, radiotherapy, targeted therapy, and immunotherapy.
- **Gastrointestinal Risk (B):** The likelihood of the patient developing gastrointestinal diseases (such as gastric ulcers, gastritis, enteritis) or related adverse reactions (such as gastrointestinal bleeding, indigestion) after taking pain medication.
- **Cardiovascular Risk (B):** The likelihood of the patient developing cardiovascular diseases (such as hypertension, coronary heart disease, myocardial infarction) or related adverse reactions (such as arrhythmia, heart failure) after taking pain medication.
- **PS Score (N):** The performance status score.

## 2. Laboratory Examination Variables

### (a) Complete Blood Count:

- **White Blood Cell Count (N):** The number of white blood cells in a unit volume of blood.
- **Red Blood Cell Count (N):** The number of red blood cells in a unit volume of blood.
- **Hemoglobin (N):** The amount of hemoglobin in a unit volume of blood.
- **Platelet Count (N):** The number of platelets in a unit volume of blood.
- **Hematocrit (N):** The volume percentage of red blood cells in blood.
- **Neutrophil Count (N):** The number of neutrophils in a unit volume of blood.
- **Lymphocyte Count (N):** The number of lymphocytes in a unit volume of blood.
- **Eosinophil Count (N):** The number of eosinophils in a unit volume of blood.
- **Basophil Count (N):** The number of basophils in a unit volume of blood.
- **Monocyte Percentage (N):** The proportion of monocytes in the total white blood cell count.
- **Neutrophil Percentage (N):** The proportion of neutrophils in the total white blood cell count.
- **Lymphocyte Percentage (N):** The proportion of lymphocytes in the total white blood cell count.
- **Basophil Percentage (N):** The proportion of basophils in the total white blood cell count.
- **Eosinophil Percentage (N):** The proportion of eosinophils in the total white blood cell count.
- **Mean Corpuscular Volume (N):** The average volume of a single red blood cell.
- **Mean Corpuscular Hemoglobin (N):** The average amount of hemoglobin in a single red blood cell.
- **Mean Corpuscular Hemoglobin Concentration (N):** The average concentration of hemoglobin in a single red blood cell.

- **Red Cell Distribution Width (N):** The variation in the size of red blood cells.
  - **Plateletcrit (N):** The volume percentage of platelets in blood.
  - **Mean Platelet Volume (N):** The average volume of a single platelet.
- (b) **Liver Function:**
- **Total Protein (N):** The total amount of proteins in a unit volume of blood.
  - **Albumin (N):** The amount of albumin in a unit volume of blood.
  - **Globulin (N):** The amount of globulin in a unit volume of blood.
  - **Albumin/Globulin Ratio (N):** The ratio of albumin to globulin in blood.
  - **Total Bilirubin (N):** The total amount of bilirubin in a unit volume of blood.
  - **Direct Bilirubin (N):** The amount of direct (conjugated) bilirubin in a unit volume of blood.
  - **Total Bile Acids (N):** The total amount of bile acids in a unit volume of blood.
  - **Alanine Aminotransferase (N):** The amount of alanine aminotransferase (ALT) in a unit volume of blood.
  - **Aspartate Aminotransferase (N):** The amount of aspartate aminotransferase (AST) in a unit volume of blood.
- (c) **Kidney Function:**
- **Urea (N):** The amount of urea in a unit volume of blood, reflecting kidney excretory function.
  - **Creatinine (N):** The amount of creatinine in a unit volume of blood, reflecting kidney filtration function.
  - **Uric Acid (N):** The amount of uric acid in a unit volume of blood, reflecting kidney excretory function and purine metabolism status.

#### Comprehensive Pain Assessment (15):

- **Pain Type (M):** Classification of pain based on the pathological mechanism.
- **Worst Pain (N):** The highest level of pain experienced in the last 24 hours, assessed using the Numerical Rating Scale (NRS).
- **Mildest Pain (N):** The lowest level of pain experienced in the last 24 hours, assessed using NRS.
- **Average Pain (N):** The average level of pain experienced in the last 24 hours, assessed using NRS.
- **Current Pain (N):** The current level of pain, assessed using NRS.
- **Impact of Pain on Daily Life (N):** The degree to which daily life was affected by pain in the past week.
- **Impact of Pain on Mood (N):** The degree to which mood was affected by pain in the past week.
- **Impact of Pain on Walking Ability (N):** The degree to which walking ability was affected by pain in the past week.
- **Impact of Pain on Daily Work (N):** The degree to which daily work was affected by pain in the past week.
- **Impact of Pain on Relationships with Others (N):** The degree to which relationships with others were affected by pain in the past week.
- **Impact of Pain on Sleep (N):** The degree to which sleep was affected by pain in the past week.
- **Impact of Pain on Interest in Life (N):** The degree to which interest in life was affected by pain in the past week.
- **Pain Frequency (M):** The number of times pain occurred in a day for cancer pain patients.

- **Type of Breakthrough Pain (M):** Classification of breakthrough pain according to the National Comprehensive Cancer Network (NCCN).
- **Frequency of Breakthrough Pain (M):** The number of times breakthrough pain occurred in a day for cancer pain patients.

**Previous Analgesic Treatment(23):**

- **Prev\_Extended Release Strong Opiates (ERSO) (N):** The number of types of extended-release strong opiates used by the patient in the past week.
- **Prev\_Immediate Release Strong Opiates (IRSO) (N):** The number of types of immediate-release strong opiates used by the patient in the past week.
- **Prev\_Extended Release Weak Opiates (ERWO) (N):** The number of types of extended-release weak opiates used by the patient in the past week.
- **Prev\_Immediate Release Weak Opiates (IRWO) (N):** The number of types of immediate-release weak opiates used by the patient in the past week.
- **Prev\_Nonsteroidal Anti-inflammatory Drugs (NSAID) (N):** The number of types of nonsteroidal anti-inflammatory drugs used by the patient in the past week.
- **Prev\_Anticonvulsants/Antidepressants (A/A) (N):** The number of types of anticonvulsants/antidepressants used by the patient in the past week.
- **Prev\_Others (N):** The number of other analgesics used by the patient in the past week, excluding ERSO, IRSO, ERWO, IRWO, NSAIDs, and A/A.
- **Opiate Tolerance (B):** Whether the patient has developed a decreased effect or reduced duration of action when using opiates for pain treatment.
- **Days of Medication Use (N):** The number of days the patient used opiates (calculated based on the highest level of opiates used if multiple types were used simultaneously).
- The following 9 items are from the Morisky Medication Adherence Scale (MMAS-8), including 8 questions and a total score:
  - **M1 (N):** Do you sometimes forget to take your medications?
  - **M2 (N):** People sometimes miss taking their medications for reasons other than forgetting. Thinking over the past two weeks, were there any days when you did not take your medications?
  - **M3 (N):** Have you ever cut back or stopped taking your medications without telling your doctor because you felt worse when you took them?
  - **M4 (N):** When you travel or leave home, do you sometimes forget to bring along your medications?
  - **M5 (N):** Did you take all your medications yesterday?
  - **M6 (N):** When you feel like your symptoms are under control, do you sometimes stop taking your medications?
  - **M7 (N):** Taking medication every day is a real inconvenience for some people. Do you ever feel hassled about sticking to your treatment plan?
  - **M8 (N):** Do you have difficulty remembering to take all your medications?
  - **MMAS-8 Total Score (N):** The total score ranges from M1 to M8, with higher scores indicating better adherence to medication.
- **Duration of Analgesic Control (N):** The duration of pain control after taking analgesics.
- **Constipation (B):** Whether the patient experienced constipation as an adverse reaction after taking analgesics.
- **Nausea/Vomiting (B):** Whether the patient experienced nausea or vomiting as an adverse reaction after taking analgesics.



- **Other Adverse Reactions (B):** Whether the patient experienced other adverse reactions besides constipation and nausea/vomiting after taking analgesics.
- **Medication for Adverse Reactions (B):** Whether the patient used medications to manage adverse reactions.

#### 650 **Evaluation of Previous Analgesic Treatment(5):**

1. The following 5 features are classified according to the Pharmaceutical Care Network Europe (PCNE) V8.0 classification of drug-related problems (DRPs):
  - **Drug-Related Problems (DRPs) (M):** Any undesirable outcome or potential issue arising during the patient's drug therapy. This includes aspects of treatment effectiveness and safety.
  - **Causes (M):** The underlying causes or factors leading to drug therapy problems.
  - **Interventions (M):** Specific actions or measures taken to address drug therapy problems. These interventions can be implemented by pharmacists, doctors, or other healthcare professionals.
  - **Acceptance of Interventions (M):** The patient's acceptance of the intervention plans proposed by healthcare professionals.
  - **Status of DRPs (M):** The resolution status of DRPs after healthcare professionals' intervention.

#### 664 **Cancer Pain Medication Decision(9):**

- **ERSO\_Recommended (N\*):** The number of extended-release strong opiates recommended by the doctor.
- **IRSO\_Recommended (N\*):** The number of immediate-release strong opiates recommended by the doctor.
- **ERWO\_Recommended (N\*):** The number of extended-release weak opiates recommended by the doctor.
- **IRWO\_Recommended (N\*):** The number of immediate-release weak opiates recommended by the doctor.
- **NSAIDs\_Recommended (N\*):** The number of nonsteroidal anti-inflammatory drugs recommended by the doctor.
- **A/A\_Recommended (N\*):** The number of anticonvulsants/antidepressants recommended by the doctor.
- **Others (N\*):** The number of other analgesics recommended by the doctor, excluding ERSO, IRSO, ERWO, IRWO, NSAIDs, and A/A.
- **Constipation Medication Recommended (M):** The types of medication recommended by the doctor for managing constipation.
- **Nausea/Vomiting Medication Recommended (M):** The types of medication recommended by the doctor for managing nausea and vomiting.

#### 683 **Follow-up(1):**

- **Pain Relief Status (M\*):** The degree of pain relief experienced by the patient after using the analgesic regimen recommended by the doctor.

## 686 **C Demographics**

687 This section examines the age distribution within the PEACE dataset. We analyze the population  
 688 breakdown across different age groups, as detailed in Table 11. The table categorizes the number of  
 689 individuals in each age group by gender.

Table 11: Population Distribution

| Age Group | Number | Male   | Female |
|-----------|--------|--------|--------|
| 18-29     | 2,681  | 1,931  | 750    |
| 30-44     | 7,675  | 5,045  | 2,630  |
| 45-59     | 14,737 | 7,663  | 7,074  |
| 60-74     | 11,054 | 4,316  | 6,738  |
| $\geq 75$ | 2,619  | 969    | 1,650  |
| Total     | 38,766 | 18,842 | 19,924 |

## D Training Details

### D.1 Baseline Models

The source code of the models used in our experiments is available at <https://github.com/YTYTYD/PEACE/tree/main/Code>.

#### Basic machine learning and neural network models:

1. Decision Trees[22]: A machine learning algorithm that predicts outcomes by recursively splitting data into subsets based on feature values, forming a tree structure of decisions.
2. Logistic Regression[5]: A machine learning algorithm used for both classification and regression tasks that models the probability of outcomes using a logistic function.
3. Random Forests[14]: A machine learning algorithm that employs an ensemble of decision trees to improve prediction accuracy and control overfitting by aggregating the predictions of multiple trees.
4. Support Vector Machines (SVM)[4]: A machine learning algorithm for classification and regression that identifies the optimal hyperplane to separate different classes in a high-dimensional space.
5. Multilayer Perceptrons (MLP)[23]: A neural network algorithm composed of multiple layers of neurons, capable of performing various tasks including classification and regression.

#### Gradient boosting decision tree models:

1. LightGBM[12]: is an advanced machine learning algorithm that implements gradient boosting on decision trees using a leaf-wise growth strategy, offering superior performance and computational efficiency for large-scale and high-dimensional datasets.
2. XGBoost[3]: is a highly optimised and scalable machine learning algorithm that applies gradient boosting techniques with features like regularisation, parallel processing, and tree pruning, achieving exceptional performance and accuracy in various predictive modelling tasks.
3. AdaBoost[6]: is a machine learning algorithm that enhances classification and regression accuracy by iteratively combining multiple weak classifiers into a strong classifier, focusing on misclassified instances to improve overall model performance.

#### Advanced neural network models:

1. iTransformer[15]: is a neural network algorithm specifically designed for time series forecasting. It inverts the traditional transformer architecture to better capture temporal dependencies and sequence patterns in time series data. By reversing the order of attention mechanisms, iTransformer focuses on leveraging past data more effectively to predict future values. The algorithm employs a novel architecture that integrates both local and global temporal information, leading to significant improvements in forecasting accuracy.

- 725 2. Transtab[29]: is a neural network algorithm based on transformer architecture, designed  
 726 to handle tabular data with varying structures by converting each row into a generalisable  
 727 embedding vector and using stacked transformers for feature encoding. It combines column  
 728 descriptions and table cells as input to a gated transformer model and leverages supervised  
 729 and self-supervised pretraining to enhance performance. Transtab excels in learning from  
 730 multiple tables with partially overlapping columns and updating models incrementally,  
 731 achieving top rankings in supervised, incremental, and transfer learning tasks across diverse  
 732 datasets.
- 733 3. Mamba[8]: is a neural network algorithm that addresses the inefficiencies of transformer  
 734 models in sequence modeling. By using selective state space models (SSMs) where param-  
 735 eters depend on the input, Mamba can selectively retain or discard information, achieving  
 736 linear scaling in sequence length without attention or MLP blocks. This design enables  
 737 faster inference and high throughput, demonstrating state-of-the-art performance across  
 738 various domains, including language, audio, and genomics, and outperforming similarly  
 739 sized transformers.

#### 740 EHR-specific models:

- 741 1. Stagenet[7]: is a neural network model designed for health risk prediction, leveraging the  
 742 identification of different stages in a patient’s disease progression to improve prediction  
 743 accuracy. The model consists of two key modules: the stage-aware LSTM module, which  
 744 automatically and unsupervisedly extracts stage variations in a patient’s health condition, and  
 745 the stage-adaptive convolutional module, which uses convolution operations to capture health  
 746 progression patterns from these stages, focusing on stage-specific features and recalibrating  
 747 them to enhance prediction outcomes.
- 748 2. Adacare[16]: is a health status representation learning model focused on EHR, capable  
 749 of capturing the variation trends of biomarkers in both long-term and short-term scales.  
 750 It uses dilated convolutions to capture features across different time scales. Additionally,  
 751 it incorporates a scale-adaptive feature recalibration module, which adaptively enhances  
 752 important features based on the patient’s health condition while suppressing irrelevant  
 753 features.

#### 754 D.2 Data splitting

755 Data splitting for model training. see Figure 5. For the TEA task, we removed some records with  
 756 missing labels.

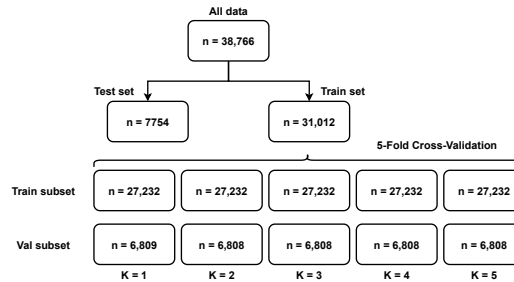

Figure 5: Data splitting for PEACE dataset

#### 757 D.3 Evaluation Metrics

758 This section describes the metrics used to evaluate the performance of the trained model. For  
 759 classification tasks, TP (True Positive) is a true positive, TN (True Negative) is a true negative, FP  
 760 (False Positive) is a false positive, and FN (False Negative) is a false negative. Our evaluation metrics

and calculation methods are shown in Table 12. For regression tasks,  $y_i$  is the actual value,  $\hat{y}_i$  is the predicted value, and  $n$  is the number of observations. Our evaluation metrics and calculation methods are shown in Table 13.

Table 12: Classification evaluation metrics

| Metric                                                         | Explanation and Formula                                                                                                                                                                                                                                   |
|----------------------------------------------------------------|-----------------------------------------------------------------------------------------------------------------------------------------------------------------------------------------------------------------------------------------------------------|
| Accuracy (ACC)                                                 | <b>Explanation:</b> Accuracy is the proportion of correctly predicted samples out of the total samples.<br><b>Formula:</b> $\text{Accuracy} = \frac{TP+TN}{TP+TN+FP+FN}$                                                                                  |
| Area Under the Receiver Operating Characteristic Curve (AUROC) | <b>Explanation:</b> AUROC is the area under the ROC curve, which evaluates the performance of a classification model. The ROC curve shows the trade-off between the true positive rate (TPR) and false positive rate (FPR) at various threshold settings. |
| Recall                                                         | <b>Explanation:</b> Recall is the proportion of true positives correctly identified by the model out of all actual positives.<br><b>Formula:</b> $\text{Recall} = \frac{TP}{TP+FN}$                                                                       |
| Precision                                                      | <b>Explanation:</b> Precision is the proportion of true positives correctly identified by the model out of all predicted positives.<br><b>Formula:</b> $\text{Precision} = \frac{TP}{TP+FP}$                                                              |
| F1 Score                                                       | <b>Explanation:</b> The F1 score is the harmonic mean of precision and recall, providing a balance between the two.<br><b>Formula:</b> $F1 = 2 \times \frac{\text{Precision} \times \text{Recall}}{\text{Precision} + \text{Recall}}$                     |

Table 13: Regression evaluation metrics

| Metric                    | Explanation and Formula                                                                                                                                                                                                                                                        |
|---------------------------|--------------------------------------------------------------------------------------------------------------------------------------------------------------------------------------------------------------------------------------------------------------------------------|
| Mean Squared Error (MSE)  | <b>Explanation:</b> MSE measures the average squared difference between the predicted values and the actual values. It gives a higher weight to larger errors, making it sensitive to outliers.<br><b>Formula:</b> $\text{MSE} = \frac{1}{n} \sum_{i=1}^n (y_i - \hat{y}_i)^2$ |
| Mean Absolute Error (MAE) | <b>Explanation:</b> MAE measures the average absolute difference between the predicted values and the actual values. It gives equal weight to all errors, making it less sensitive to outliers.<br><b>Formula:</b> $\text{MAE} = \frac{1}{n} \sum_{i=1}^n  y_i - \hat{y}_i $   |

#### D.4 Detailed Experimental Results

Tables 14 and 15 respectively present the performance evaluation details of TEA and MR tasks, including the detailed evaluation metrics for each fold, the mean and error of the 5-folds, and the values for the independent test set. The statistical and analytical processing of experimental results retains four decimal places to minimise rounding errors. We acknowledge that data processing and visualisation tasks, including calculations of means and errors, are supported by large language models (LLMs).

## E Release and Usage of Dataset

We release the PEACE dataset under a CC-BY license. The dataset access involves three steps:

1. Complete some training and provide certification (such as the CITI or GCP certification).
2. Carefully read the terms of the Data Use Agreement and if you agree and wish to proceed, send your application to the manager. Please use an official email address (such as .edu).
3. Final approval of data access is required by Xiangya Hospital

Once an application is approved, the researcher will receive an email with instructions for downloading the dataset. We estimate a response time of 20 business days for processing requests. This duration may vary depending on the completeness of the provided information and can take up to three months. Any model trained on this dataset should not be deployed in real-world systems

Table 14: Details of TEA Task Model Performance Evaluation

| Decision Tree       |        |        |        |        |        |                     |        |
|---------------------|--------|--------|--------|--------|--------|---------------------|--------|
| Metric              | Fold 1 | Fold 2 | Fold 3 | Fold 4 | Fold 5 | Mean $\pm$ SE       | Test   |
| Accuracy            | 0.7105 | 0.7297 | 0.7178 | 0.7224 | 0.7139 | 0.7189 $\pm$ 0.0030 | 0.7236 |
| F1 Score            | 0.6588 | 0.6770 | 0.6531 | 0.6630 | 0.6590 | 0.6622 $\pm$ 0.0035 | 0.6659 |
| Recall              | 0.6640 | 0.6797 | 0.6574 | 0.6627 | 0.6590 | 0.6645 $\pm$ 0.0037 | 0.6745 |
| Precision           | 0.6540 | 0.6747 | 0.6490 | 0.6633 | 0.6593 | 0.6601 $\pm$ 0.0042 | 0.6591 |
| AUROC               | 0.7758 | 0.7876 | 0.7744 | 0.7775 | 0.7738 | 0.7778 $\pm$ 0.0025 | 0.7838 |
| Logistic Regression |        |        |        |        |        |                     |        |
| Metric              | Fold 1 | Fold 2 | Fold 3 | Fold 4 | Fold 5 | Mean $\pm$ SE       | Test   |
| Accuracy            | 0.6743 | 0.6752 | 0.6822 | 0.6729 | 0.6854 | 0.6780 $\pm$ 0.0022 | 0.6836 |
| F1 Score            | 0.6040 | 0.6079 | 0.5989 | 0.6025 | 0.6065 | 0.6040 $\pm$ 0.0015 | 0.6028 |
| Recall              | 0.5740 | 0.5795 | 0.5694 | 0.5754 | 0.5707 | 0.5738 $\pm$ 0.0018 | 0.5730 |
| Precision           | 0.6748 | 0.6760 | 0.6713 | 0.6671 | 0.6988 | 0.6776 $\pm$ 0.0052 | 0.6734 |
| AUROC               | 0.7198 | 0.7225 | 0.7190 | 0.7200 | 0.7198 | 0.7202 $\pm$ 0.0011 | 0.7204 |
| Random Forest       |        |        |        |        |        |                     |        |
| Metric              | Fold 1 | Fold 2 | Fold 3 | Fold 4 | Fold 5 | Mean $\pm$ SE       | Test   |
| Accuracy            | 0.7800 | 0.7830 | 0.7855 | 0.7886 | 0.7858 | 0.7846 $\pm$ 0.0014 | 0.7916 |
| F1 Score            | 0.7405 | 0.7396 | 0.7318 | 0.7370 | 0.7382 | 0.7374 $\pm$ 0.0016 | 0.7416 |
| Recall              | 0.7044 | 0.7025 | 0.6936 | 0.7006 | 0.6994 | 0.7001 $\pm$ 0.0020 | 0.7031 |
| Precision           | 0.8119 | 0.8123 | 0.8082 | 0.8089 | 0.8125 | 0.8108 $\pm$ 0.0010 | 0.8139 |
| AUROC               | 0.8084 | 0.8079 | 0.8041 | 0.8083 | 0.8069 | 0.8071 $\pm$ 0.0010 | 0.8097 |
| SVM                 |        |        |        |        |        |                     |        |
| Metric              | Fold 1 | Fold 2 | Fold 3 | Fold 4 | Fold 5 | Mean $\pm$ SE       | Test   |
| Accuracy            | 0.6598 | 0.6580 | 0.6691 | 0.6634 | 0.6735 | 0.6648 $\pm$ 0.0025 | 0.6694 |
| F1 Score            | 0.5679 | 0.5627 | 0.5680 | 0.5771 | 0.5658 | 0.5683 $\pm$ 0.0024 | 0.5678 |
| Recall              | 0.5474 | 0.5478 | 0.5434 | 0.5542 | 0.5396 | 0.5465 $\pm$ 0.0025 | 0.5459 |
| Precision           | 0.6533 | 0.6433 | 0.6612 | 0.6555 | 0.6789 | 0.6584 $\pm$ 0.0058 | 0.6533 |
| AUROC               | 0.7023 | 0.7018 | 0.7018 | 0.7063 | 0.7009 | 0.7026 $\pm$ 0.0011 | 0.7028 |
| MLP                 |        |        |        |        |        |                     |        |
| Metric              | Fold 1 | Fold 2 | Fold 3 | Fold 4 | Fold 5 | Mean $\pm$ SE       | Test   |
| Accuracy            | 0.7257 | 0.7347 | 0.7402 | 0.7399 | 0.7464 | 0.7374 $\pm$ 0.0033 | 0.7508 |
| F1 Score            | 0.6746 | 0.6859 | 0.6738 | 0.6807 | 0.6857 | 0.6801 $\pm$ 0.0023 | 0.6955 |
| Recall              | 0.6673 | 0.6787 | 0.6720 | 0.6781 | 0.6691 | 0.6730 $\pm$ 0.0020 | 0.6831 |
| Precision           | 0.6852 | 0.6941 | 0.6771 | 0.6840 | 0.7076 | 0.6896 $\pm$ 0.0048 | 0.7109 |
| AUROC               | 0.7799 | 0.7874 | 0.7853 | 0.7885 | 0.7848 | 0.7852 $\pm$ 0.0015 | 0.7925 |
| XGBoost             |        |        |        |        |        |                     |        |
| Metric              | Fold 1 | Fold 2 | Fold 3 | Fold 4 | Fold 5 | Mean $\pm$ SE       | Test   |
| Accuracy            | 0.7840 | 0.7976 | 0.7966 | 0.7989 | 0.7963 | 0.7947 $\pm$ 0.0023 | 0.8063 |
| F1 Score            | 0.7501 | 0.7579 | 0.7434 | 0.7532 | 0.7474 | 0.7504 $\pm$ 0.0024 | 0.7607 |
| Recall              | 0.7218 | 0.7261 | 0.7114 | 0.7234 | 0.7101 | 0.7186 $\pm$ 0.0033 | 0.7301 |
| Precision           | 0.7952 | 0.8080 | 0.7964 | 0.8012 | 0.8107 | 0.8023 $\pm$ 0.0027 | 0.8080 |
| AUROC               | 0.8182 | 0.8226 | 0.8155 | 0.8220 | 0.8144 | 0.8185 $\pm$ 0.0015 | 0.8265 |
| LightGBM            |        |        |        |        |        |                     |        |
| Metric              | Fold 1 | Fold 2 | Fold 3 | Fold 4 | Fold 5 | Mean $\pm$ SE       | Test   |
| Accuracy            | 0.7925 | 0.8067 | 0.8053 | 0.8038 | 0.8034 | 0.8023 $\pm$ 0.0024 | 0.8108 |
| F1 Score            | 0.7623 | 0.7717 | 0.7569 | 0.7577 | 0.7592 | 0.7616 $\pm$ 0.0023 | 0.7723 |
| Recall              | 0.7338 | 0.7392 | 0.7233 | 0.7282 | 0.7240 | 0.7297 $\pm$ 0.0028 | 0.7406 |
| Precision           | 0.8093 | 0.8258 | 0.8149 | 0.8079 | 0.8195 | 0.8155 $\pm$ 0.0031 | 0.8234 |
| AUROC               | 0.8261 | 0.8315 | 0.8232 | 0.8257 | 0.8231 | 0.8259 $\pm$ 0.0015 | 0.8327 |
| AdaBoost            |        |        |        |        |        |                     |        |
| Metric              | Fold 1 | Fold 2 | Fold 3 | Fold 4 | Fold 5 | Mean $\pm$ SE       | Test   |
| Accuracy            | 0.6620 | 0.6671 | 0.6614 | 0.6684 | 0.6646 | 0.6647 $\pm$ 0.0011 | 0.6852 |
| F1 Score            | 0.5668 | 0.5534 | 0.5614 | 0.5682 | 0.5480 | 0.5596 $\pm$ 0.0031 | 0.5961 |
| Recall              | 0.5567 | 0.5527 | 0.5470 | 0.5622 | 0.5377 | 0.5513 $\pm$ 0.0038 | 0.5725 |
| Precision           | 0.6395 | 0.6069 | 0.6372 | 0.6320 | 0.6451 | 0.6321 $\pm$ 0.0073 | 0.6776 |
| AUROC               | 0.7063 | 0.7056 | 0.7010 | 0.7114 | 0.6972 | 0.7043 $\pm$ 0.0027 | 0.7196 |
| Transtab            |        |        |        |        |        |                     |        |
| Metric              | Fold 1 | Fold 2 | Fold 3 | Fold 4 | Fold 5 | Mean $\pm$ SE       | Test   |
| Accuracy            | 0.5840 | 0.5716 | 0.5922 | 0.5877 | 0.5822 | 0.5835 $\pm$ 0.0034 | 0.5835 |
| F1 Score            | 0.3129 | 0.3087 | 0.3246 | 0.3169 | 0.3217 | 0.3170 $\pm$ 0.0029 | 0.3170 |
| Recall              | 0.3394 | 0.3390 | 0.3532 | 0.3470 | 0.3459 | 0.3449 $\pm$ 0.0026 | 0.3449 |
| Precision           | 0.3524 | 0.2834 | 0.4815 | 0.2918 | 0.3305 | 0.3479 $\pm$ 0.0357 | 0.3479 |
| AUROC               | 0.6623 | 0.6562 | 0.6627 | 0.6656 | 0.6505 | 0.6595 $\pm$ 0.0027 | 0.6594 |
| iTransformer        |        |        |        |        |        |                     |        |
| Metric              | Fold 1 | Fold 2 | Fold 3 | Fold 4 | Fold 5 | Mean $\pm$ SE       | Test   |
| Accuracy            | 0.5762 | 0.7325 | 0.6918 | 0.5573 | 0.7473 | 0.6606 $\pm$ 0.0396 | 0.6831 |
| F1 Score            | 0.5497 | 0.7269 | 0.6872 | 0.5328 | 0.7348 | 0.6456 $\pm$ 0.0437 | 0.6827 |
| Recall              | 0.5765 | 0.7332 | 0.6915 | 0.5576 | 0.7476 | 0.6608 $\pm$ 0.0397 | 0.6839 |
| Precision           | 0.5496 | 0.7248 | 0.6965 | 0.5524 | 0.7327 | 0.6506 $\pm$ 0.0413 | 0.6817 |
| AUROC               | 0.6583 | 0.7405 | 0.7266 | 0.6517 | 0.7433 | 0.7036 $\pm$ 0.0203 | 0.7340 |
| Mamba               |        |        |        |        |        |                     |        |
| Metric              | Fold 1 | Fold 2 | Fold 3 | Fold 4 | Fold 5 | Mean $\pm$ SE       | Test   |
| Accuracy            | 0.6723 | 0.7608 | 0.7364 | 0.6577 | 0.8091 | 0.7272 $\pm$ 0.0281 | 0.7606 |
| F1 Score            | 0.6545 | 0.7623 | 0.7406 | 0.6414 | 0.8094 | 0.7212 $\pm$ 0.0322 | 0.7625 |
| Recall              | 0.6728 | 0.7609 | 0.7357 | 0.6579 | 0.8102 | 0.7272 $\pm$ 0.0282 | 0.7630 |
| Precision           | 0.6802 | 0.7633 | 0.7511 | 0.6731 | 0.8094 | 0.7352 $\pm$ 0.0259 | 0.7621 |
| AUROC               | 0.7315 | 0.7902 | 0.7813 | 0.7164 | 0.8256 | 0.7686 $\pm$ 0.0200 | 0.7959 |
| StageNet            |        |        |        |        |        |                     |        |
| Metric              | Fold 1 | Fold 2 | Fold 3 | Fold 4 | Fold 5 | Mean $\pm$ SE       | Test   |
| Accuracy            | 0.6790 | 0.7792 | 0.7041 | 0.7291 | 0.7541 | 0.7291 $\pm$ 0.0177 | 0.7832 |
| F1 Score            | 0.7422 | 0.8361 | 0.7659 | 0.7894 | 0.8128 | 0.7893 $\pm$ 0.0166 | 0.7271 |
| Recall              | 0.6880 | 0.7536 | 0.7044 | 0.7208 | 0.7372 | 0.7208 $\pm$ 0.0116 | 0.6898 |
| Precision           | 0.8059 | 0.9391 | 0.8392 | 0.8725 | 0.9058 | 0.8725 $\pm$ 0.0235 | 0.7688 |
| AUROC               | 0.7349 | 0.7537 | 0.7396 | 0.7443 | 0.7490 | 0.7443 $\pm$ 0.0033 | 0.7443 |
| AdaCare             |        |        |        |        |        |                     |        |
| Metric              | Fold 1 | Fold 2 | Fold 3 | Fold 4 | Fold 5 | Mean $\pm$ SE       | Test   |
| Accuracy            | 0.7106 | 0.7598 | 0.755  | 0.7681 | 0.7599 | 0.7507 $\pm$ 0.0111 | 0.7582 |
| F1 Score            | 0.6664 | 0.7185 | 0.7203 | 0.7251 | 0.7136 | 0.7087 $\pm$ 0.0107 | 0.7252 |
| Recall              | 0.5964 | 0.6746 | 0.6794 | 0.6834 | 0.6720 | 0.6612 $\pm$ 0.0326 | 0.6836 |
| Precision           | 0.7550 | 0.7684 | 0.7664 | 0.7724 | 0.7609 | 0.7646 $\pm$ 0.0061 | 0.7724 |
| AUROC               | 0.8438 | 0.8511 | 0.8546 | 0.8578 | 0.8499 | 0.8515 $\pm$ 0.0047 | 0.8588 |

Table 15: Details of MR Task Model Performance Evaluation

| ERSO                |            |            |            |            |            |               |          |            |            |            |            |               |               |          |
|---------------------|------------|------------|------------|------------|------------|---------------|----------|------------|------------|------------|------------|---------------|---------------|----------|
| Model               | Fold 1 MSE | Fold 2 MSE | Fold 3 MSE | Fold 4 MSE | Fold 5 MSE | Mean MSE      | Test MSE | Fold 1 MAE | Fold 2 MAE | Fold 3 MAE | Fold 4 MAE | Fold 5 MAE    | Mean MAE      | Test MAE |
| Decision Tree       | 0.0333     | 0.0363     | 0.0373     | 0.0401     | 0.0394     | 0.0373±0.0012 | 0.0473   | 0.0322     | 0.0354     | 0.0358     | 0.0389     | 0.0376        | 0.0360±0.0011 | 0.0443   |
| Logistic Regression | 0.1262     | 0.1295     | 0.1234     | 0.1289     | 0.1311     | 0.1278±0.0014 | 0.1328   | 0.1259     | 0.1292     | 0.1228     | 0.1281     | 0.1297        | 0.1271±0.0013 | 0.1321   |
| Random Forest       | 0.0172     | 0.0184     | 0.0189     | 0.0199     | 0.0202     | 0.0189±0.0005 | 0.0234   | 0.0357     | 0.0364     | 0.0390     | 0.0391     | 0.0396        | 0.0380±0.0008 | 0.0440   |
| SVM                 | 0.1545     | 0.1630     | 0.1672     | 0.1951     | 0.1721     | 0.1704±0.0068 | 0.3417   | 0.2701     | 0.2677     | 0.2704     | 0.2719     | 0.2810        | 0.2722±0.0023 | 0.2764   |
| MLP                 | 0.0378     | 0.0337     | 0.0396     | 0.0357     | 0.0386     | 0.0371±0.0016 | 0.6994   | 0.1125     | 0.1120     | 0.1140     | 0.1140     | 0.1221        | 0.1149±0.0018 | 0.1219   |
| XGBoost             | 0.0190     | 0.0206     | 0.0210     | 0.0230     | 0.0213     | 0.0210±0.0006 | 0.0265   | 0.0493     | 0.0523     | 0.0551     | 0.0554     | 0.0510        | 0.0526±0.0012 | 0.0572   |
| LightGBM            | 0.0174     | 0.0186     | 0.0192     | 0.0198     | 0.0197     | 0.0189±0.0004 | 0.0236   | 0.0437     | 0.0435     | 0.0454     | 0.0454     | 0.0455        | 0.0447±0.0005 | 0.0497   |
| AdaBoost            | 0.1607     | 0.2267     | 0.1774     | 0.1982     | 0.1875     | 0.1913±0.0099 | 0.1947   | 0.3947     | 0.4734     | 0.4012     | 0.4311     | 0.4233        | 0.4247±0.0139 | 0.4293   |
| TransTab            | 0.2796     | 0.2857     | 0.2804     | 0.2831     | 0.2850     | 0.2828±0.0012 | 0.2828   | 0.2787     | 0.2855     | 0.2785     | 0.2828     | 0.2833        | 0.2818±0.0014 | 0.2818   |
| tTransformer        | 0.0573     | 0.0181     | 0.0264     | 0.0911     | 0.0285     | 0.0442±0.0134 | 0.0259   | 0.0762     | 0.0716     | 0.0815     | 0.1423     | 0.0875        | 0.0808±0.0152 | 0.0257   |
| Mamba               | 0.0214     | 0.0193     | 0.0249     | 0.0780     | 0.0130     | 0.0313±0.0118 | 0.0190   | 0.0388     | 0.0431     | 0.0590     | 0.1178     | 0.0380        | 0.0526±0.0140 | 0.0387   |
| StageNet            | 0.0342     | 0.0210     | 0.0327     | 0.0416     | 0.0188     | 0.0297±0.0042 | 0.0288   | 0.0775     | 0.0717     | 0.0772     | 0.082      | 0.0699        | 0.0756±0.0021 | 0.0736   |
| AdaCare             | 0.0254     | 0.0179     | 0.0295     | 0.0327     | 0.0175     | 0.0246±0.0031 | 0.0221   | 0.0271     | 0.0225     | 0.0339     | 0.0347     | 0.0223        | 0.0281±0.0027 | 0.0261   |
| IRSO                |            |            |            |            |            |               |          |            |            |            |            |               |               |          |
| Model               | Fold 1 MSE | Fold 2 MSE | Fold 3 MSE | Fold 4 MSE | Fold 5 MSE | Mean MSE      | Test MSE | Fold 1 MAE | Fold 2 MAE | Fold 3 MAE | Fold 4 MAE | Fold 5 MAE    | Mean MAE      | Test MAE |
| Decision Tree       | 0.0269     | 0.0263     | 0.0336     | 0.0305     | 0.0273     | 0.0289±0.0014 | 0.0309   | 0.0269     | 0.0263     | 0.0333     | 0.0305     | 0.0273        | 0.0289±0.0013 | 0.0306   |
| Logistic Regression | 0.1163     | 0.1079     | 0.1203     | 0.1126     | 0.1137     | 0.1142±0.0021 | 0.1114   | 0.1163     | 0.1079     | 0.1203     | 0.1126     | 0.1137        | 0.1142±0.0021 | 0.1107   |
| Random Forest       | 0.0153     | 0.0134     | 0.0179     | 0.0153     | 0.0155     | 0.0155±0.0007 | 0.0158   | 0.0305     | 0.0279     | 0.0340     | 0.0318     | 0.0313        | 0.0311±0.0010 | 0.0322   |
| SVM                 | 0.1651     | 0.1577     | 0.1802     | 0.1802     | 0.1605     | 0.1663±0.0039 | 0.1713   | 0.1609     | 0.1561     | 0.1716     | 0.1624     | 0.1555        | 0.1613±0.0028 | 0.1619   |
| MLP                 | 0.0315     | 0.0296     | 0.0326     | 0.0332     | 0.0310     | 0.0316±0.0006 | 0.1076   | 0.1022     | 0.1047     | 0.1077     | 0.1105     | 0.1048        | 0.1060±0.0014 | 0.1050   |
| XGBoost             | 0.0165     | 0.0143     | 0.0188     | 0.0169     | 0.0160     | 0.0165±0.0007 | 0.0164   | 0.0420     | 0.0392     | 0.0445     | 0.0424     | 0.0421        | 0.0420±0.0008 | 0.0430   |
| LightGBM            | 0.0150     | 0.0137     | 0.0179     | 0.0156     | 0.0147     | 0.0154±0.0007 | 0.0156   | 0.0357     | 0.0347     | 0.0396     | 0.0371     | 0.0363        | 0.0367±0.0008 | 0.0365   |
| AdaBoost            | 0.0779     | 0.0491     | 0.0489     | 0.1262     | 0.0793     | 0.0763±0.0141 | 0.1083   | 0.2304     | 0.1485     | 0.1467     | 0.3335     | 0.2301        | 0.2178±0.0343 | 0.2940   |
| TransTab            | 0.2392     | 0.2397     | 0.2295     | 0.2324     | 0.2324     | 0.2330±0.0021 | 0.2358   | 0.2240     | 0.2293     | 0.2290     | 0.2274     | 0.2330        | 0.2329±0.0022 | 0.2329   |
| tTransformer        | 0.0851     | 0.0399     | 0.0343     | 0.0936     | 0.0357     | 0.0537±0.0151 | 0.0375   | 0.1275     | 0.1192     | 0.1464     | 0.1820     | 0.0720        | 0.1091±0.0203 | 0.1181   |
| Mamba               | 0.0223     | 0.0100     | 0.0112     | 0.0552     | 0.0083     | 0.0214±0.0088 | 0.0100   | 0.0246     | 0.0324     | 0.0283     | 0.1021     | 0.0264        | 0.0373±0.0133 | 0.0339   |
| StageNet            | 0.1845     | 0.1769     | 0.1810     | 0.1709     | 0.1798     | 0.1798±0.0027 | 0.1810   | 0.3632     | 0.3556     | 0.3597     | 0.3644     | 0.3496        | 0.3585±0.0027 | 0.3590   |
| AdaCare             | 0.0175     | 0.0152     | 0.0162     | 0.0191     | 0.0145     | 0.0165±0.0009 | 0.0156   | 0.0201     | 0.0186     | 0.0190     | 0.0218     | 0.0175        | 0.0194±0.0007 | 0.0185   |
| ERWO                |            |            |            |            |            |               |          |            |            |            |            |               |               |          |
| Model               | Fold 1 MSE | Fold 2 MSE | Fold 3 MSE | Fold 4 MSE | Fold 5 MSE | Mean MSE      | Test MSE | Fold 1 MAE | Fold 2 MAE | Fold 3 MAE | Fold 4 MAE | Fold 5 MAE    | Mean MAE      | Test MAE |
| Decision Tree       | 0.0082     | 0.0112     | 0.0116     | 0.0100     | 0.0093     | 0.0101±0.0006 | 0.0130   | 0.0082     | 0.0112     | 0.0116     | 0.0100     | 0.0093        | 0.0101±0.0006 | 0.0130   |
| Logistic Regression | 0.0203     | 0.0216     | 0.0216     | 0.0181     | 0.0210     | 0.0205±0.0007 | 0.0221   | 0.0203     | 0.0216     | 0.0216     | 0.0181     | 0.0210        | 0.0205±0.0007 | 0.0221   |
| Random Forest       | 0.0055     | 0.0061     | 0.0056     | 0.0054     | 0.0052     | 0.0056±0.0002 | 0.1149   | 0.0111     | 0.0119     | 0.0122     | 0.0108     | 0.0114        | 0.0114±0.0003 | 0.0137   |
| SVM                 | 0.0300     | 0.0301     | 0.0298     | 0.0332     | 0.0317     | 0.0310±0.0007 | 0.0319   | 0.0300     | 0.0301     | 0.0298     | 0.0332     | 0.0317        | 0.0310±0.0007 | 0.0319   |
| MLP                 | 0.0171     | 0.0109     | 0.0105     | 0.0113     | 0.0104     | 0.0120±0.0013 | 0.0691   | 0.0717     | 0.0511     | 0.0510     | 0.0561     | 0.0505        | 0.0561±0.0040 | 0.0518   |
| XGBoost             | 0.0074     | 0.0066     | 0.0073     | 0.0064     | 0.0061     | 0.0068±0.0003 | 0.0079   | 0.0165     | 0.0166     | 0.0177     | 0.0159     | 0.0154        | 0.0164±0.0004 | 0.0191   |
| LightGBM            | 0.0056     | 0.0061     | 0.0059     | 0.0053     | 0.0053     | 0.0056±0.0002 | 0.0065   | 0.0135     | 0.0141     | 0.0144     | 0.0124     | 0.0134        | 0.0136±0.0004 | 0.0151   |
| AdaBoost            | 0.0193     | 0.0173     | 0.0206     | 0.0156     | 0.0096     | 0.0165±0.0109 | 0.1912   | 0.0486     | 0.0472     | 0.0569     | 0.0446     | 0.0186        | 0.0432±0.0065 | 0.0529   |
| TransTab            | 0.0294     | 0.0309     | 0.0296     | 0.0314     | 0.0279     | 0.0298±0.0006 | 0.0298   | 0.0294     | 0.0309     | 0.0296     | 0.0314     | 0.0279        | 0.0302±0.0004 | 0.0298   |
| tTransformer        | 0.0010     | 0.0076     | 0.0071     | 0.0622     | 0.0052     | 0.0184±0.0110 | 0.0060   | 0.0346     | 0.0271     | 0.0283     | 0.1238     | 0.0200        | 0.0400±0.0172 | 0.0229   |
| Mamba               | 0.0498     | 0.0013     | 0.0038     | 0.0026     | 0.0020     | 0.0234±0.0132 | 0.0020   | 0.0167     | 0.0140     | 0.0148     | 0.0086     | 0.0247±0.0148 | 0.0111        |          |
| StageNet            | 0.2029     | 0.2014     | 0.2028     | 0.2045     | 0.2004     | 0.2024±0.0007 | 0.1302   | 0.4055     | 0.4037     | 0.4051     | 0.4072     | 0.4025        | 0.4048±0.0008 | 0.2731   |
| AdaCare             | 0.0099     | 0.0059     | 0.0085     | 0.0114     | 0.0046     | 0.0081±0.0013 | 0.0066   | 0.0115     | 0.0063     | 0.0090     | 0.0137     | 0.0045        | 0.0090±0.0016 | 0.0117   |
| IRWO                |            |            |            |            |            |               |          |            |            |            |            |               |               |          |
| Model               | Fold 1 MSE | Fold 2 MSE | Fold 3 MSE | Fold 4 MSE | Fold 5 MSE | Mean MSE      | Test MSE | Fold 1 MAE | Fold 2 MAE | Fold 3 MAE | Fold 4 MAE | Fold 5 MAE    | Mean MAE      | Test MAE |
| Decision Tree       | 0.0144     | 0.0163     | 0.0167     | 0.0148     | 0.0159     | 0.0156±0.0004 | 0.0168   | 0.0144     | 0.0163     | 0.0167     | 0.0148     | 0.0159        | 0.0156±0.0004 | 0.0168   |
| Logistic Regression | 0.0458     | 0.0420     | 0.0442     | 0.0414     | 0.0394     | 0.0426±0.0011 | 0.0391   | 0.0458     | 0.0420     | 0.0442     | 0.0414     | 0.0394        | 0.0426±0.0011 | 0.0391   |
| Random Forest       | 0.0077     | 0.0087     | 0.0100     | 0.0069     | 0.0076     | 0.0082±0.0005 | 0.0087   | 0.0159     | 0.0165     | 0.0186     | 0.0151     | 0.0158        | 0.0164±0.0006 | 0.0172   |
| SVM                 | 0.0975     | 0.0975     | 0.0949     | 0.0936     | 0.0954     | 0.0955±0.0011 | 0.0980   | 0.0984     | 0.0984     | 0.0981     | 0.0957     | 0.0984        | 0.0956±0.0011 | 0.0980   |
| MLP                 | 0.0180     | 0.0144     | 0.0166     | 0.0145     | 0.0149     | 0.0157±0.0007 | 0.0847   | 0.0718     | 0.0620     | 0.0659     | 0.0667     | 0.0655        | 0.0664±0.0016 | 0.1007   |
| XGBoost             | 0.0088     | 0.0091     | 0.0109     | 0.0083     | 0.0085     | 0.0091±0.0005 | 0.0098   | 0.0271     | 0.0269     | 0.0286     | 0.0281     | 0.0287        | 0.0278±0.0004 | 0.0281   |
| LightGBM            | 0.0078     | 0.0086     | 0.0099     | 0.0069     | 0.0075     | 0.0081±0.0008 | 0.0086   | 0.0188     | 0.0191     | 0.0211     | 0.0183     | 0.0190        | 0.0193±0.0005 | 0.0198   |
| AdaBoost            | 0.0472     | 0.0484     | 0.0483     | 0.0503     | 0.0541     | 0.0497±0.0012 | 0.0471   | 0.1121     | 0.1151     | 0.1107     | 0.1179     | 0.1217        | 0.1155±0.0020 | 0.1122   |
| TransTab            | 0.0807     | 0.0803     | 0.0766     | 0.0799     | 0.0816     | 0.0798±0.0009 | 0.0798   | 0.0807     | 0.0803     | 0.0766     | 0.0800     | 0.0813        | 0.0797±0.0008 | 0.0798   |
| tTransformer        | 0.0105     | 0.0052     | 0.0070     | 0.0124     | 0.0041     | 0.0078±0.0016 | 0.0060   | 0.0465     | 0.0293     | 0.0426     | 0.0651     | 0.0410        | 0.0384±0.0080 | 0.0300   |
| Mamba               | 0.0079     | 0.0021     | 0.0027     | 0.0273     | 0.0269     | 0.0114±0.0057 | 0.0021   | 0.0174     | 0.0061     | 0.0144     | 0.0552     | 0.0572        | 0.0254±0.0100 | 0.0121   |
| StageNet            | 0.0801     | 0.0802     | 0.0850     | 0.0859     | 0.0867     | 0.0823±0.0013 | 0.0818   | 0.1723     | 0.1720     | 0.1770     | 0.1776     | 0.1731        | 0.1744±0.0012 | 0.1732   |
| AdaCare             | 0.0086     | 0.0096     | 0.0144     | 0.0133     | 0.0103     | 0.0116±0.0013 | 0.0079   | 0.0109     | 0.0119     | 0.0167     | 0.0174     | 0.0126        | 0.0139±0.0013 | 0.0085   |
| NSAID               |            |            |            |            |            |               |          |            |            |            |            |               |               |          |
| Model               | Fold 1 MSE | Fold 2 MSE | Fold 3 MSE | Fold 4 MSE | Fold 5 MSE | Mean MSE      | Test MSE | Fold 1 MAE | Fold 2 MAE | Fold 3 MAE | Fold 4 MAE | Fold 5 MAE    | Mean MAE      | Test MAE |
| Decision Tree       | 0.1379     | 0.1425     | 0.1397     | 0.1370     | 0.1451     | 0.1404±0.0015 | 0.1493   | 0.1373     | 0.1419     | 0.1394     | 0.1358     | 0.1442        | 0.1397±0.0015 | 0.1489   |
| Logistic Regression | 0.0956     | 0.0941     | 0.0907     | 0.0937     | 0.0937     | 0.0958±0.0009 | 0.1011   | 0.0953     | 0.0938     | 0.0974     | 0.0966     | 0.0937        | 0.0945±0.0009 | 0.1004   |
| Random Forest       | 0.0709     | 0.0684     | 0.0719     | 0.0722     | 0.0698     | 0.0706±0.0007 | 0.0745   | 0.1405     | 0.1370     | 0.1420     | 0.1427     | 0.1405        | 0.1405±0.0010 | 0.1461   |
| SVM                 | 0.1283     | 0.1297     | 0.1368     | 0.1307     | 0.1278     | 0.1307±0.0016 | 0.1324   | 0.1193     | 0.1186     | 0.1228     | 0.1201     | 0.1165        | 0.1195±0.0010 | 0.1235   |
| MLP                 | 0.0877     | 0.0835     | 0.0923     | 0.0858     | 0.0850     | 0.0869±0.0015 | 0.3490   | 0.1915     | 0.1900     | 0.2015     | 0.1932     | 0.1931        | 0.1939±0.0020 | 0.1985   |
| XGBoost             | 0.0715     | 0.0722     | 0.0736     | 0.0735     | 0.0716     | 0.0725±0.0005 | 0.0766   | 0.1493     | 0.1484     | 0.1516     | 0.1521     | 0.1491        | 0.1501±0.0007 | 0.1532   |
| LightGBM            | 0.0669     | 0.0662     | 0.0697     | 0.0676     | 0.0667     | 0.0674±0.0006 | 0.0714   | 0.1364     | 0.1347     | 0.1390     | 0.1386     | 0.1368        | 0.1371±0.0008 | 0.1415   |
| AdaBoost            | 0.2356     | 0.2344     | 0.223      |            |            |               |          |            |            |            |            |               |               |          |

781 until its performance has been rigorously evaluated and the system's scope and representative-  
782 ness in relation to real-world applications have been validated. Data usage must strictly adhere  
783 to applicable regulations in China. Access to the PEACE dataset can be found at the following  
784 address:[<https://github.com/YTYTYD/PEACE>].

## 785 **E.1 Dataset Documentation**

### 786 **Main Data:**

- 787 1. All\_Data.csv: a .CSV file containing all patients in the dataset, with patient ID.
- 788 2. All\_data.json: a .JSON file describing all the data in the dataset.

### 789 **Dictionaries:**

- 790 1. D\_Numerical.csv: A .csv file containing the units of the numerical features.
- 791 2. D\_Multiclass.csv: A .csv file containing the meaning of multiclass features.
- 792 3. D\_Diagnosis.csv: A .csv file containing the meaning of diagnosis.

### 793 **Model Training:**

- 794 1. Train data: a .CSV file containing the training set of patients.
- 795 2. Test data: a .CSV file containing the test set of patients.

## 796 **E.2 Responsibility Statement**

797 The corresponding author(s) acknowledge and accept full responsibility for any potential infringement  
798 of rights associated with this dataset.

## 799 **E.3 Ethical Considerations**

800 All data are de-identified to the greatest extent possible and stored in a database controlled internally  
801 by Xiangya Hospital. This work has been approved by the Xiangya Hospital Institutional Review  
802 Board (Ethics Approval No.: 202109422). The data are available for future research by other Xiangya  
803 Hospital researchers. Access for external researchers will be provided under restricted conditions,  
804 with permissions ultimately reviewed by the Xiangya Hospital.

## 805 **F Samples and Case Studies**

### 806 **Sample 1:**

807 As shown in Table 16, the patient in Sample 1 was diagnosed with a malignant tumor of the right  
808 kidney with multiple metastases. The patient denies any history of allergies, smoking, or alcohol  
809 consumption. Chemotherapy was chosen as the treatment method for the tumor. After evaluation,  
810 no cardiovascular or gastrointestinal risks were identified. The results of the complete blood count,  
811 liver function, and kidney function tests were all within normal ranges. The type of pain experienced  
812 is somatic, with a Numerical Rating Scale (NRS) score of 8 at its most severe, 6 at its least severe,  
813 an average of 8, and currently 6. This indicates severe pain that significantly affects the patient's  
814 daily life and emotions. The pain occurs three or more times per day. Breakthrough pain is of the  
815 end-of-dose type, occurring three or more times per day. The tumor symptoms are severe. The  
816 patient has been using sustained-release strong opioids for three days, with a compliance score of  
817 5.75, and has not tolerated opioids well. Pain control lasts for six hours post-medication, with side  
818 effects of constipation, nausea, and vomiting, which have been managed with additional medications.  
819 The patient's pain control is poor, possibly due to inappropriate medication selection. The doctor  
820 and pharmacist recommended continuing the use of sustained-release strong opioids and adding  
821 NSAIDs, along with medications for constipation and nausea. The patient fully complied with and

followed the advice. One week later, during follow-up, the pain was mildly relieved and evaluated as moderate pain. It was recommended to increase the dose of sustained-release strong opioids, continue using NSAIDs, and medications for adverse effects. After adjusting the dose, the pain was partially relieved, but breakthrough pain persisted. It was recommended to use sustained-release strong opioids, immediate-release strong opioids, and NSAIDs. Following this adjustment, the patient's pain was completely relieved, and it was recommended to continue the treatment as per the original plan.

**Sample 2:**

As shown in Table 17, the patient in Sample 2 was diagnosed with a malignant tumor of the jejunum. The patient denies any history of allergies, smoking, or alcohol consumption. The treatment for the tumor involved surgery. After evaluation, there were no cardiovascular or gastrointestinal risks. The results of the complete blood count, liver function, and kidney function tests were all normal. The type of pain experienced is visceral pain, with an NRS (Numerical Rating Scale) of 6 at its most severe, 3 at its least severe, an average of 5, and currently 2. The pain affects daily life and emotions. The frequency of pain is less than three times per day, with activity-induced breakthrough pain occurring less than three times per day. The tumor symptoms are mild. The patient has been using immediate-release weak opioids for 10 days, with a compliance score of 3.25. Nausea and vomiting were observed after medication administration. Poor pain control might be due to an insufficient dose. The pharmacist and doctor recommended continuing the use of immediate-release weak opioids and increasing the dose, along with antiemetic medication. After administration, the pain was partially relieved. Five days later, the patient's NRS was 7 at its most severe, 4 at its least severe, with an average of 6, and currently 6. No breakthrough pain was reported. The patient had been using immediate-release weak opioids for 15 days, with a compliance score of 7. The analgesic effect was poor, possibly due to inappropriate medication selection. After discussion with the pharmacist, the doctor adjusted the medication to sustained-release strong opioids. The patient fully complied and followed the advice. One week later, during follow-up, the pain was partially relieved after taking sustained-release strong opioids.

**Sample 3:**

As shown in Table 18, the patient in Sample 3 was diagnosed with a malignant tumor of the ascending colon. The patient denies any history of allergies or smoking but has a history of alcohol consumption. After evaluation, there were no cardiovascular or gastrointestinal risks. The results of the complete blood count, liver function, and kidney function tests were all normal. The type of pain is mixed, with an NRS (Numerical Rating Scale) of 10 at its most severe, 2 at its least severe, an average of 6, and currently 8. The pain affects daily life and emotions. The pain frequency is less than three times per day, with breakthrough pain of the end-of-dose type occurring three or more times per day. The tumor symptoms are severe. Currently, the patient is not using any analgesic medication. The pharmacist and doctor recommended immediate-release weak opioids, which partially relieved the pain after administration. One week later, the patient's NRS was 4 at its most severe, 2 at its least severe, with an average of 3, and currently 2. The pain has a slight impact on daily life and emotions, with no breakthrough pain. The patient has been using immediate-release weak opioids for 7 days, with a compliance score of 6.5. After medication, pain control lasts for 5 hours, with no adverse reactions observed. The analgesic effect is poor, possibly due to inappropriate medication selection. After discussion with the pharmacist, the doctor adjusted the medication to sustained-release strong opioids. The patient fully complied and followed the advice. One week later, during follow-up, the patient's pain was completely relieved after taking sustained-release strong opioids.

**Sample 4:**

As shown in Table 19, the patient in Sample 4 was diagnosed with a malignant neck tumor. The patient denies any history of smoking, allergies, or alcohol consumption. Upon evaluation, there were no cardiovascular or gastrointestinal risks identified. Results from the complete blood count, liver function, and kidney function tests were all within normal ranges. The patient's pain is characterized as somatic, with a Numerical Rating Scale (NRS) score of 10 at its most severe, 6 at its least severe, an average of 7, and currently 5. The pain significantly impacts daily life and emotional well-being and is persistent. The patient experiences breakthrough pain less than three times per day, primarily activity-



Table 16: Sample 1

| Patient Basic Information                  |                                    |                                     |                                        |                                             |
|--------------------------------------------|------------------------------------|-------------------------------------|----------------------------------------|---------------------------------------------|
| ID                                         | Gender                             | Age                                 | Height                                 | Weight                                      |
| SJ-289031                                  | 1                                  | 59                                  | 170                                    | 75                                          |
| SJ-289031                                  | 1                                  | 59                                  | 170                                    | 75                                          |
| SJ-289031                                  | 1                                  | 59                                  | 170                                    | 75                                          |
| SJ-289031                                  | 1                                  | 59                                  | 170                                    | 75                                          |
| BMI                                        | Body Surface Area (BSA)            | Medical Record Date                 | Length of Hospital Stay                | Number of Hospital Admissions               |
| 25.95                                      | 1.8441                             | 2050/2/10                           | 1                                      | 1                                           |
| 25.95                                      | 1.8441                             | 2050/2/12                           | 3                                      | 2                                           |
| 25.95                                      | 1.8441                             | 2050/2/19                           | 10                                     | 3                                           |
| 25.95                                      | 1.8441                             | 2050/2/26                           | 17                                     | 4                                           |
| Diagnosis                                  | Smoking History                    | Drinking History                    | Allergy History                        | Tumour Treatment Methods                    |
| 112                                        | 0                                  | 0                                   | 0                                      | 2                                           |
| 112                                        | 0                                  | 0                                   | 0                                      | 2                                           |
| 112                                        | 0                                  | 0                                   | 0                                      | 2                                           |
| 112                                        | 0                                  | 0                                   | 0                                      | 2                                           |
| Cardiovascular Risk                        | Gastrointestinal Risk              | PS Score                            | White Blood Cell Count                 | Red Blood Cell Count                        |
| 0                                          | 0                                  | 3                                   | 7.5                                    | 5.3                                         |
| 0                                          | 0                                  | 2                                   | 4.2                                    | 4.62                                        |
| 0                                          | 0                                  | 2                                   | 5.6                                    | 3.84                                        |
| 0                                          | 0                                  | 2                                   | 4.7                                    | 5.17                                        |
| Hemoglobin                                 | Platelet Count                     | Hematocrit                          | Neutrophil Count                       | Lymphocyte Count                            |
| 162                                        | 130                                | 48.2                                | 4.4                                    | 1.8                                         |
| 140                                        | 184                                | 42.1                                | 2.3                                    | 1.5                                         |
| 120                                        | 146                                | 34.5                                | 4.2                                    | 1                                           |
| 150                                        | 131                                | 45.8                                | 2.2                                    | 1.9                                         |
| Eosinophil Count                           | Basophil Count                     | Monocyte Percentage                 | Neutrophil Percentage                  | Lymphocyte Percentage                       |
| 0.43                                       | 0.06                               | 10.5                                | 58.9                                   | 24                                          |
| 0.1                                        | 0                                  | 8.2                                 | 54.3                                   | 35                                          |
| 0                                          | 0                                  | 6.8                                 | 75.7                                   | 17.4                                        |
| 0.08                                       | 0.02                               | 11.8                                | 46.4                                   | 39.7                                        |
| Basophil Percentage                        | Eosinophil Percentage              | Mean Corpuscular Volume             | Mean Corpuscular Hemoglobin            | Mean Corpuscular Hemoglobin Concentration   |
| 0.9                                        | 5.8                                | 90.8                                | 30.6                                   | 336.7                                       |
| 0.7                                        | 1.8                                | 91                                  | 30.3                                   | 332.5                                       |
| 0.1                                        | 0                                  | 89.7                                | 31.3                                   | 348.6                                       |
| 0.4                                        | 1.7                                | 88.6                                | 29                                     | 328                                         |
| Red Cell Distribution Width                | Plateletcrit                       | Mean Platelet Volume                | Total Protein                          | Albumin                                     |
| 14.5                                       | 0.13                               | 10.1                                | 67.6                                   | 38.3                                        |
| 13.2                                       | 0.15                               | 8.36                                | 63.5                                   | 40.5                                        |
| 14.1                                       | 0.04                               | 8.65                                | 61.4                                   | 41.4                                        |
| 13.9                                       | 0.15                               | 11.4                                | 54.4                                   | 36.9                                        |
| Globulin                                   | Albumin/Globulin Ratio             | Total Bilirubin                     | Direct Bilirubin                       | Total Bile Acids                            |
| 28.8                                       | 1.3                                | 14.5                                | 6.8                                    | 5.5                                         |
| 23                                         | 1.8                                | 7.3                                 | 3.9                                    | 3.4                                         |
| 20                                         | 2.1                                | 4.8                                 | 1.3                                    | 3.2                                         |
| 17.5                                       | 2.1                                | 17.7                                | 6.3                                    | 8.1                                         |
| Alanine Aminotransferase                   | Aspartate Aminotransferase         | Urea                                | Creatinine                             | Uric Acid                                   |
| 17.4                                       | 17.5                               | 5.38                                | 88                                     | 421.8                                       |
| 27.8                                       | 17.5                               | 5.63                                | 78                                     | 381.5                                       |
| 12.6                                       | 11.4                               | 4.26                                | 68.1                                   | 291.3                                       |
|                                            |                                    | 7.5                                 | 58.6                                   | 345.4                                       |
| Comprehensive Pain Assessment              |                                    |                                     |                                        |                                             |
| Pain Type                                  | Worst Pain                         | Mildest Pain                        | Average Pain                           | Current Pain                                |
| 2                                          | 8                                  | 6                                   | 8                                      | 6                                           |
| 2                                          | 6                                  | 4                                   | 6                                      | 3                                           |
| 2                                          | 6                                  | 2                                   | 2                                      | 1                                           |
| 2                                          | 1                                  | 0                                   | 1                                      | 0                                           |
| Impact of Pain on Daily Life               | Impact of Pain on Mood             | Impact of Pain on Walking Ability   | Impact of Pain on Daily Work           | Impact of Pain on Relationships with Others |
| 3                                          | 4                                  | 7                                   | 6                                      | 0                                           |
| 1                                          | 0                                  | 1                                   | 3                                      | 0                                           |
| 1                                          | 0                                  | 2                                   | 4                                      | 0                                           |
| Impact of Pain on Sleep                    | Impact of Pain on Interest in Life | Pain Frequency                      | Type of Breakthrough Pain              | Frequency of Breakthrough Pain              |
| 10                                         | 6                                  | 2                                   | 2                                      | 2                                           |
| 5                                          | 0                                  | 2                                   | 2                                      | 1                                           |
| 1                                          | 0                                  | 1                                   | 2                                      | 2                                           |
| 1                                          | 0                                  | 0                                   | 0                                      | 0                                           |
| Previous Analgesic Treatment               |                                    |                                     |                                        |                                             |
| Prev_ERSO                                  | Prev_IRSO                          | Prev_ERWO                           | Prev_IRWO                              | Prev_NSAID                                  |
| 0                                          | 0                                  | 0                                   | 0                                      | 0                                           |
| 1                                          | 0                                  | 0                                   | 0                                      | 1                                           |
| 1                                          | 0                                  | 0                                   | 0                                      | 1                                           |
| 1                                          | 1                                  | 0                                   | 0                                      | 1                                           |
| Prev_A/A                                   | Prev_Others                        | Opiate Tolerance                    | Days of Medication Use                 | M1                                          |
| 0                                          | 0                                  | 0                                   | 3                                      | 1                                           |
| 0                                          | 0                                  | 0                                   | 5                                      | 1                                           |
| 0                                          | 0                                  | 0                                   | 12                                     | 1                                           |
| 0                                          | 0                                  | 0                                   | 19                                     | 1                                           |
| M2                                         | M3                                 | M4                                  | M5                                     | M6                                          |
| 1                                          | 1                                  | 0                                   | 1                                      | 1                                           |
| 1                                          | 1                                  | 1                                   | 1                                      | 1                                           |
| 1                                          | 1                                  | 1                                   | 1                                      | 1                                           |
| 1                                          | 1                                  | 1                                   | 1                                      | 1                                           |
| M7                                         | M8                                 | MMAS-8 Total Score                  | Duration of Analgesic Control          | Constipation                                |
| 0                                          | 0.75                               | 5.75                                | 6                                      | 1                                           |
| 1                                          | 1                                  | 8                                   | 8                                      | 1                                           |
| 1                                          | 1                                  | 8                                   | 8                                      | 1                                           |
| 1                                          | 1                                  | 8                                   | 12                                     | 1                                           |
| Nausea/Vomiting                            | Other Adverse Reactions            | Medication for Adverse Reactions    |                                        |                                             |
| 1                                          | 0                                  | 1                                   |                                        |                                             |
| 1                                          | 0                                  | 1                                   |                                        |                                             |
| 0                                          | 0                                  | 1                                   |                                        |                                             |
| 0                                          | 0                                  | 1                                   |                                        |                                             |
| Cancer Pain Medication Decision            |                                    |                                     |                                        |                                             |
| ERSO_Recom                                 | IRSO_Recom                         | ERWO_Recom                          | IRWO_Recom                             | NSAIDs_Recom                                |
| 0                                          | 0                                  | 0                                   | 0                                      | 1                                           |
| 1                                          | 0                                  | 0                                   | 0                                      | 1                                           |
| 1                                          | 0                                  | 0                                   | 0                                      | 1                                           |
| 1                                          | 0                                  | 0                                   | 0                                      | 1                                           |
| A/A_Recom                                  | Others_Recom                       | Constipation Medication Recommended | Nausea/Vomiting Medication Recommended |                                             |
| 0                                          | 0                                  | 2                                   | 1                                      |                                             |
| 0                                          | 0                                  | 2                                   | 1                                      |                                             |
| 0                                          | 0                                  | 2                                   | 0                                      |                                             |
| 0                                          | 0                                  | 2                                   | 0                                      |                                             |
| Evaluation of Previous Analgesic Treatment |                                    |                                     |                                        |                                             |
| Drug-Related Problems                      | Causes                             | Interventions                       | Acceptance of Interventions            | Status of DRPs                              |
| 2                                          | 1                                  | 15                                  | 1                                      | 3                                           |
| 2                                          | 9                                  | 11                                  | 1                                      | 3                                           |
| 2                                          | 9                                  | 10                                  | 1                                      | 3                                           |
| 0                                          | 0                                  | 0                                   | 0                                      | 1                                           |
| Follow-up                                  |                                    |                                     |                                        |                                             |
| Pain Relief Status                         |                                    |                                     |                                        |                                             |
| 1                                          |                                    |                                     |                                        |                                             |
| 2                                          |                                    |                                     |                                        |                                             |
| 2                                          |                                    |                                     |                                        |                                             |
| 1                                          |                                    |                                     |                                        |                                             |

Table 17: Sample 2

| Patient Basic Information                  |                                    |                                     |                                        |                                             |
|--------------------------------------------|------------------------------------|-------------------------------------|----------------------------------------|---------------------------------------------|
| ID                                         | Gender                             | Age                                 | Height                                 | Weight                                      |
| SJ-514441                                  | 0                                  | 53                                  | 152                                    | 36                                          |
| SJ-514441                                  | 0                                  | 53                                  | 152                                    | 36                                          |
| BMI                                        | Body Surface Area (BSA)            | Medical Record Date                 | Length of Hospital Stay                | Number of Hospital Admissions               |
|                                            | 1.2351                             | 2052/2/3                            | 2                                      | 2                                           |
|                                            | 1.2351                             | 2052/4/11                           | 2                                      | 5                                           |
| Diagnosis                                  | Smoking History                    | Drinking History                    | Allergy History                        | Tumour Treatment Methods                    |
| 54                                         | 0                                  | 0                                   | 0                                      | 1                                           |
| 54                                         | 0                                  | 0                                   | 0                                      | 1                                           |
| Cardiovascular Risk                        | Gastrointestinal Risk              | PS Score                            | White Blood Cell Count                 | Red Blood Cell Count                        |
| 0                                          | 0                                  | 1                                   | 10.8                                   | 5.43                                        |
| 0                                          | 0                                  | 2                                   | 7.1                                    | 4.98                                        |
| Hemoglobin                                 | Platelet Count                     | Hematocrit                          | Neutrophil Count                       | Lymphocyte Count                            |
| 133                                        | 175                                | 36.2                                | 5.4                                    | 1.3                                         |
| 141                                        | 128                                | 43.5                                | 5.2                                    | 1.3                                         |
| Eosinophil Count                           | Basophil Count                     | Monocyte Percentage                 | Neutrophil Percentage                  | Lymphocyte Percentage                       |
| 0                                          | 0                                  | 0.5                                 | 89                                     | 10.4                                        |
| 0                                          | 0.1                                | 7.6                                 | 73.3                                   | 18.1                                        |
| Basophil Percentage                        | Eosinophil Percentage              | Mean Corpuscular Volume             | Mean Corpuscular Hemoglobin            | Mean Corpuscular Hemoglobin Concentration   |
| 0.1                                        | 0                                  | 66.7                                | 20.7                                   | 311                                         |
| 0.7                                        | 0.3                                | 67.2                                | 20.9                                   | 311.6                                       |
| Red Cell Distribution Width                | Plateletcrit                       | Mean Platelet Volume                | Total Protein                          | Albumin                                     |
| 16.8                                       | 0.18                               | 10.4                                |                                        |                                             |
| 16.2                                       | 0.12                               | 9.63                                | 64.7                                   | 39.9                                        |
| Globulin                                   | Albumin/Globulin Ratio             | Total Bilirubin                     | Direct Bilirubin                       | Total Bile Acids                            |
| 24.8                                       | 1.6                                | 15.3                                | 4.4                                    | 3.1                                         |
| Alanine Aminotransferase                   | Aspartate Aminotransferase         | Urea                                | Creatinine                             | Uric Acid                                   |
| 26.7                                       | 27.5                               | 5.5                                 | 67                                     | 379.8                                       |
| Comprehensive Pain Assessment              |                                    |                                     |                                        |                                             |
| Pain Type                                  | Worst Pain                         | Mildest Pain                        | Average Pain                           | Current Pain                                |
| 1                                          | 6                                  | 3                                   | 5                                      | 6                                           |
| 1                                          | 7                                  | 4                                   | 6                                      | 6                                           |
| Impact of Pain on Daily Life               | Impact of Pain on Mood             | Impact of Pain on Walking Ability   | Impact of Pain on Daily Work           | Impact of Pain on Relationships with Others |
| 3                                          | 3                                  | 3                                   | 4                                      | 5                                           |
| 5                                          | 5                                  | 3                                   | 3                                      | 5                                           |
| Impact of Pain on Sleep                    | Impact of Pain on Interest in Life | Pain Frequency                      | Type of Breakthrough Pain              | Frequency of Breakthrough Pain              |
| 3                                          | 3                                  | 0                                   | 1                                      | 1                                           |
| 5                                          | 4                                  | 0                                   | 0                                      | 0                                           |
| Previous Analgesic Treatment               |                                    |                                     |                                        |                                             |
| Prev_ERSO                                  | Prev_IRSO                          | Prev_ERWO                           | Prev_IRWO                              | Prev_NSAlD                                  |
| 0                                          | 0                                  | 0                                   | 1                                      | 0                                           |
| 0                                          | 0                                  | 0                                   | 1                                      | 0                                           |
| Prev_A/A                                   | Prev_Others                        | Opiate Tolerance                    | Days of Medication Use                 | M1                                          |
| 0                                          | 0                                  | 0                                   | 10                                     | 0                                           |
| 0                                          | 1                                  | 0                                   | 15                                     | 0                                           |
| M2                                         | M3                                 | M4                                  | M5                                     | M6                                          |
| 1                                          | 1                                  | 0                                   | 0                                      | 0                                           |
| 1                                          | 1                                  | 1                                   | 1                                      | 1                                           |
| M7                                         | M8                                 | MMAS-8 Total Score                  | Duration of Analgesic Control          | Constipation                                |
| 1                                          | 0.25                               | 3.25                                | 7                                      | 0                                           |
| 1                                          | 1                                  | 7                                   | 6                                      | 0                                           |
| Nausea/Vomiting                            | Other Adverse Reactions            | Medication for Adverse Reactions    |                                        |                                             |
| 1                                          | 0                                  | 0                                   |                                        |                                             |
| 1                                          | 0                                  | 0                                   |                                        |                                             |
| Cancer Pain Medication Decision            |                                    |                                     |                                        |                                             |
| ERSO_Recom                                 | IRSO_Recom                         | ERWO_Recom                          | IRWO_Recom                             | NSAIDs_Recom                                |
| 0                                          | 0                                  | 0                                   | 1                                      | 0                                           |
| 1                                          | 0                                  | 0                                   | 0                                      | 0                                           |
| A/A_Recom                                  | Others_Recom                       | Constipation Medication Recommended | Nausea/Vomiting Medication Recommended |                                             |
| 0                                          | 0                                  | 0                                   |                                        | 1                                           |
| 0                                          | 0                                  | 0                                   |                                        |                                             |
| Evaluation of Previous Analgesic Treatment |                                    |                                     |                                        |                                             |
| Drug-Related Problems                      | Causes                             | Interventions                       | Acceptance of Interventions            | Status of DRPs                              |
| 2                                          | 9                                  | 11                                  | 1                                      | 2                                           |
| 2                                          | 1                                  | 10                                  | 2                                      | 3                                           |
| Follow-up                                  |                                    |                                     |                                        |                                             |
| Pain Relief Status                         |                                    |                                     |                                        |                                             |
| 2                                          |                                    |                                     |                                        |                                             |
| 2                                          |                                    |                                     |                                        |                                             |

Table 18: Sample 3

| Patient Basic Information                  |                                    |                                     |                                        |                                             |
|--------------------------------------------|------------------------------------|-------------------------------------|----------------------------------------|---------------------------------------------|
| ID                                         | Gender                             | Age                                 | Height                                 | Weight                                      |
| SJ-921252                                  | 1                                  | 81                                  | 162                                    | 60                                          |
| SJ-921252                                  | 1                                  | 80                                  | 162                                    | 60                                          |
| BMI                                        | Body Surface Area (BSA)            | Medical Record Date                 | Length of Hospital Stay                | Number of Hospital Admissions               |
|                                            | 1.2351                             | 2074/10/20                          | 11                                     | 2                                           |
|                                            | 1.2351                             | 2073/8/13                           | 6                                      | 1                                           |
| Diagnosis                                  | Smoking History                    | Drinking History                    | Allergy History                        | Tumour Treatment Methods                    |
| 744                                        | 0                                  | 1                                   | 0                                      |                                             |
| 744                                        | 0                                  | 1                                   | 0                                      |                                             |
| Cardiovascular Risk                        | Gastrointestinal Risk              | PS Score                            | White Blood Cell Count                 | Red Blood Cell Count                        |
| 0                                          | 0                                  | 3                                   | 4.9                                    | 4.11                                        |
| 0                                          | 0                                  | 0                                   | 5.5                                    | 4.08                                        |
| Hemoglobin                                 | Platelet Count                     | Hematocrit                          | Neutrophil Count                       | Lymphocyte Count                            |
| 145                                        | 145                                | 39                                  | 7                                      |                                             |
| 137                                        | 177                                | 41.3                                | 4.1                                    | 0.9                                         |
| Eosinophil Count                           | Basophil Count                     | Monocyte Percentage                 | Neutrophil Percentage                  | Lymphocyte Percentage                       |
| 0                                          | 0                                  | 8.3                                 | 73.5                                   | 17.1                                        |
| Basophil Percentage                        | Eosinophil Percentage              | Mean Corpuscular Volume             | Mean Corpuscular Hemoglobin            | Mean Corpuscular Hemoglobin Concentration   |
| 0.3                                        | 0.8                                | 101.2                               | 33.6                                   | 332                                         |
| Red Cell Distribution Width                | Plateletcrit                       | Mean Platelet Volume                | Total Protein                          | Albumin                                     |
| 14.8                                       | 0.08                               | 10.32                               | 70                                     | 40.9                                        |
| Globulin                                   | Albumin/Globulin Ratio             | Total Bilirubin                     | Direct Bilirubin                       | Total Bile Acids                            |
| 29.1                                       | 1.4                                | 18.3                                | 5.2                                    | 9.7                                         |
| Alanine Aminotransferase                   | Aspartate Aminotransferase         | Urea                                | Creatinine                             | Uric Acid                                   |
|                                            |                                    | 5.76                                | 58                                     | 232.1                                       |
| Comprehensive Pain Assessment              |                                    |                                     |                                        |                                             |
| Pain Type                                  | Worst Pain                         | Mildest Pain                        | Average Pain                           | Current Pain                                |
| 4                                          | 10                                 | 2                                   | 6                                      | 8                                           |
| 1                                          | 4                                  | 2                                   | 3                                      | 2                                           |
| Impact of Pain on Daily Life               | Impact of Pain on Mood             | Impact of Pain on Walking Ability   | Impact of Pain on Daily Work           | Impact of Pain on Relationships with Others |
| 4                                          | 5                                  | 3                                   | 4                                      | 4                                           |
| 1                                          | 0                                  | 0                                   | 0                                      | 2                                           |
| Impact of Pain on Sleep                    | Impact of Pain on Interest in Life | Pain Frequency                      | Type of Breakthrough Pain              | Frequency of Breakthrough Pain              |
| 3                                          | 4                                  | 1                                   | 2                                      | 2                                           |
| 2                                          | 1                                  | 0                                   | 0                                      | 0                                           |
| Previous Analgesic Treatment               |                                    |                                     |                                        |                                             |
| Prev_ERSO                                  | Prev_IRSO                          | Prev_ERWO                           | Prev_IRWO                              | Prev_NSAD                                   |
| 0                                          | 0                                  | 0                                   | 0                                      | 0                                           |
| 0                                          | 0                                  | 0                                   | 1                                      | 0                                           |
| Prev_A/A                                   | Prev_Others                        | Opiate Tolerance                    | Days of Medication Use                 | M1                                          |
| 0                                          | 0                                  | 0                                   |                                        |                                             |
| 0                                          | 0                                  | 0                                   | 7                                      | 1                                           |
| M2                                         | M3                                 | M4                                  | M5                                     | M6                                          |
| 1                                          | 1                                  | 1                                   | 1                                      | 1                                           |
| M7                                         | M8                                 | MMAS-8 Total Score                  | Duration of Analgesic Control          | Constipation                                |
| 0                                          | 0.5                                | 6.5                                 | 5                                      | 0                                           |
|                                            |                                    |                                     |                                        | 0                                           |
| Nausea/Vomiting                            | Other Adverse Reactions            | Medication for Adverse Reactions    |                                        |                                             |
| 0                                          | 0                                  | 0                                   |                                        |                                             |
| 0                                          | 0                                  | 0                                   |                                        |                                             |
| Cancer Pain Medication Decision            |                                    |                                     |                                        |                                             |
| ERSO_Recom                                 | IRSO_Recom                         | ERWO_Recom                          | IRWO_Recom                             | NSAIDs_Recom                                |
| 0                                          | 0                                  | 0                                   | 1                                      | 0                                           |
| 1                                          | 0                                  | 0                                   | 0                                      | 0                                           |
| A/A_Recom                                  | Others_Recom                       | Constipation Medication Recommended | Nausea/Vomiting Medication Recommended |                                             |
| 0                                          | 0                                  |                                     |                                        |                                             |
| 0                                          | 0                                  |                                     |                                        |                                             |
| Evaluation of Previous Analgesic Treatment |                                    |                                     |                                        |                                             |
| Drug-Related Problems                      | Causes                             | Interventions                       | Acceptance of Interventions            | Status of DRPs                              |
| 2                                          | 1                                  | 10                                  | 1                                      | 2                                           |
| Follow-up                                  |                                    |                                     |                                        |                                             |
| Pain Relief Status                         |                                    |                                     |                                        |                                             |
| 2                                          |                                    |                                     |                                        |                                             |
| 1                                          |                                    |                                     |                                        |                                             |

induced. The tumor symptoms are severe. Currently, the patient is on non-steroidal anti-inflammatory drugs (NSAIDs) and has been on this medication for 5 days, achieving a compliance score of 7.75. Pain relief lasts less than 1 hour after taking analgesics, with no adverse reactions reported. The analgesic effect is poor, possibly due to inappropriate medication selection. Following a discussion with the pharmacist, the physician adjusted the medication regimen to include sustained-release strong opioids combined with NSAIDs. The patient fully adhered to and followed the prescribed advice. One week later, during a follow-up visit, the patient's pain was completely relieved after medication.

Table 19: Sample 4

| Patient Basic Information                  |                                                          |                                     |                                        |                                             |
|--------------------------------------------|----------------------------------------------------------|-------------------------------------|----------------------------------------|---------------------------------------------|
| ID                                         | Gender                                                   | Age                                 | Height                                 | Weight                                      |
| SJ-854841                                  | 0                                                        | 56                                  | 165                                    | 65                                          |
| BMI                                        | Body Surface Area (BSA)                                  | Medical Record Date                 | Length of Hospital Stay                | Number of Hospital Admissions               |
|                                            |                                                          | 2089/5/31                           | 13                                     | 1                                           |
| Diagnosis                                  | Smoking History                                          | Drinking History                    | Allergy History                        | Tumour Treatment Methods                    |
| 27                                         | 0                                                        | 0                                   | 0                                      |                                             |
| Cardiovascular Risk                        | Gastrointestinal Risk                                    | PS Score                            | White Blood Cell Count                 | Red Blood Cell Count                        |
| 0                                          | 0                                                        | 3                                   | 6.5                                    | 4.42                                        |
| Hemoglobin                                 | Platelet Count                                           | Hematocrit                          | Neutrophil Count                       | Lymphocyte Count                            |
| 138                                        | 250                                                      | 41                                  | 4.7                                    | 1.1                                         |
| Eosinophil Count                           | Basophil Count                                           | Monocyte Percentage                 | Neutrophil Percentage                  | Lymphocyte Percentage                       |
| 0.12                                       | 0.03                                                     | 7                                   | 73.1                                   | 17.7                                        |
| Basophil Percentage                        | Eosinophil Percentage                                    | Mean Corpuscular Volume             | Mean Corpuscular Hemoglobin            | Mean Corpuscular Hemoglobin Concentration   |
| 0.4                                        | 1.8                                                      | 92.8                                | 31.2                                   | 336.6                                       |
| Red Cell Distribution Width                | Plateletcrit                                             | Mean Platelet Volume                | Total Protein                          | Albumin                                     |
| 14                                         | 0.22                                                     | 8.64                                | 67.8                                   | 42.7                                        |
| Globulin                                   | Albumin/Globulin Ratio                                   | Total Bilirubin                     | Direct Bilirubin                       | Total Bile Acids                            |
| 25.1                                       | 1.7                                                      | 12                                  | 6.2                                    | 4.8                                         |
| Alanine Aminotransferase                   | Aspartate Aminotransferase                               | Urea                                | Creatinine                             | Uric Acid                                   |
| 15.4                                       | 17.7                                                     | 4.67                                | 57                                     | 257                                         |
| Comprehensive Pain Assessment              |                                                          |                                     |                                        |                                             |
| Pain Type                                  | Worst Pain                                               | Mildest Pain                        | Average Pain                           | Current Pain                                |
| 2                                          | 10                                                       | 6                                   | 7                                      | 5                                           |
| Impact of Pain on Daily Life               | Impact of Pain on Mood                                   | Impact of Pain on Walking Ability   | Impact of Pain on Daily Work           | Impact of Pain on Relationships with Others |
| 9                                          | 6                                                        | 10                                  | 9                                      | 10                                          |
| Impact of Pain on Sleep                    | Impact of Pain on Interest in Life                       | Pain Frequency                      | Type of Breakthrough Pain              | Frequency of Breakthrough Pain              |
| 10                                         | 10                                                       | 3                                   | 1                                      | 1                                           |
| Previous Analgesic Treatment               |                                                          |                                     |                                        |                                             |
| Prev_ERSO                                  | Prev_IRSO                                                | Prev_ERWO                           | Prev_IRWO                              | Prev_NSAID                                  |
| 0                                          | 0                                                        | 0                                   | 0                                      | 1                                           |
| Prev_A/A                                   | Prev_Others                                              | Opiate Tolerance                    | Days of Medication Use                 | M1                                          |
| 0                                          | 0                                                        | 0                                   | 5                                      | 1                                           |
| M2                                         | M3                                                       | M4                                  | M5                                     | M6                                          |
| 1                                          | 1                                                        | 1                                   | 1                                      | 1                                           |
| M7                                         | M8                                                       | MMAS-8 Total Score                  | Duration of Analgesic Control          | Constipation                                |
| 1                                          | 0.75                                                     | 7.75                                | 1                                      | 0                                           |
| Nausea/Vomiting<br>ons                     | Other Adverse Reacti<br>Medication for Adverse Reactions |                                     |                                        |                                             |
| 0                                          | 0                                                        | 0                                   |                                        |                                             |
| Cancer Pain Medication Decision            |                                                          |                                     |                                        |                                             |
| ERSO_Recom                                 | IRSO_Recom                                               | ERWO_Recom                          | IRWO_Recom                             | NSAIDs_Recom                                |
| 1                                          | 0                                                        | 0                                   | 0                                      | 1                                           |
| A/A_Recom                                  | Others_Recom                                             | Constipation Medication Recommended | Nausea/Vomiting Medication Recommended |                                             |
| 0                                          | 0                                                        |                                     |                                        |                                             |
| Evaluation of Previous Analgesic Treatment |                                                          |                                     |                                        |                                             |
| Drug-Related Problems                      | Causes                                                   | Interventions                       | Acceptance of Interventions            | Status of DRPs                              |
| 2                                          | 1                                                        | 10                                  | 1                                      | 3                                           |
| Follow-up                                  |                                                          |                                     |                                        |                                             |
| Pain Relief Status                         |                                                          |                                     |                                        |                                             |
| 1                                          |                                                          |                                     |                                        |                                             |

## Sample 5:

As shown in Table 20, the patient in Sample 5 was diagnosed with adenocarcinoma of the upper left lung. The patient denies any history of allergies or alcohol consumption but has a history of smoking. Cardiovascular and gastrointestinal evaluations revealed no risks. Complete blood count, liver function, and kidney function tests were all normal. The patient reports experiencing visceral pain, with a Numerical Rating Scale (NRS) score of 10 at its most severe, 5 at its least severe, an average of 7, and a current score of 5. This pain significantly affects daily life and emotions and is persistent. The patient experiences breakthrough pain less than three times per day, classified as end-of-dose pain. The tumor symptoms are tolerable. Currently, the patient is using immediate-release weak opioids and has been on this medication for 31 days, with a compliance score of 7. Pain control

lasts for 5 hours after taking the analgesics, with no adverse reactions observed. The analgesic effect is poor, possibly due to inappropriate medication selection. After consultation with the pharmacist, the doctor adjusted the medication to sustained-release strong opioids. The patient fully complied with the new regimen. One week later, during follow-up, the patient reported complete pain relief after taking the sustained-release strong opioids.

Table 20: Sample 5

| Patient Basic Information                  |                                    |                                     |                                        |                                             |
|--------------------------------------------|------------------------------------|-------------------------------------|----------------------------------------|---------------------------------------------|
| ID                                         | Gender                             | Age                                 | Height                                 | Weight                                      |
| SJ-996524                                  | 1                                  | 40                                  | 172                                    | 49                                          |
| BMI                                        | Body Surface Area (BSA)            | Medical Record Date                 | Length of Hospital Stay                | Number of Hospital Admissions               |
|                                            |                                    | 2100/6/17                           | 5                                      | 1                                           |
| Diagnosis                                  | Smoking History                    | Drinking History                    | Allergy History                        | Tumour Treatment Methods                    |
| 118                                        | 1                                  | 0                                   | 0                                      |                                             |
| Cardiovascular Risk                        | Gastrointestinal Risk              | PS Score                            | White Blood Cell Count                 | Red Blood Cell Count                        |
| 0                                          | 0                                  | 2                                   | 9.2                                    | 4.3                                         |
| Hemoglobin                                 | Platelet Count                     | Hematocrit                          | Neutrophil Count                       | Lymphocyte Count                            |
| 127                                        | 391                                | 36.4                                | 6.7                                    | 0.5                                         |
| Eosinophil Count                           | Basophil Count                     | Monocyte Percentage                 | Neutrophil Percentage                  | Lymphocyte Percentage                       |
| 0.91                                       | 0.07                               | 9.5                                 | 85.7                                   | 1.7                                         |
| Basophil Percentage                        | Eosinophil Percentage              | Mean Corpuscular Volume             | Mean Corpuscular Hemoglobin            | Mean Corpuscular Hemoglobin Concentration   |
| 0.2                                        | 2.9                                | 84.7                                | 27.2                                   | 321                                         |
| Red Cell Distribution Width                | Plateletcrit                       | Mean Platelet Volume                | Total Protein                          | Albumin                                     |
| 14.4                                       | 0.32                               | 8.1                                 | 58.2                                   | 31.4                                        |
| Globulin                                   | Albumin/Globulin Ratio             | Total Bilirubin                     | Direct Bilirubin                       | Total Bile Acids                            |
| 26.8                                       | 1.2                                | 7.8                                 | 2.5                                    | 3.7                                         |
| Alanine Aminotransferase                   | Aspartate Aminotransferase         | Urea                                | Creatinine                             | Uric Acid                                   |
|                                            |                                    | 2.72                                | 44                                     | 125.9                                       |
| Comprehensive Pain Assessment              |                                    |                                     |                                        |                                             |
| Pain Type                                  | Worst Pain                         | Mildest Pain                        | Average Pain                           | Current Pain                                |
| 1                                          | 10                                 | 5                                   | 7                                      | 5                                           |
| Impact of Pain on Daily Life               | Impact of Pain on Mood             | Impact of Pain on Walking Ability   | Impact of Pain on Daily Work           | Impact of Pain on Relationships with Others |
| 10                                         | 7                                  | 6                                   | 10                                     | 9                                           |
| Impact of Pain on Sleep                    | Impact of Pain on Interest in Life | Pain Frequency                      | Type of Breakthrough Pain              | Frequency of Breakthrough Pain              |
| 7                                          | 6                                  | 0                                   | 2                                      | 1                                           |
| Previous Analgesic Treatment               |                                    |                                     |                                        |                                             |
| Prev_ERSO                                  | Prev_IRSO                          | Prev_ERWO                           | Prev_IRWO                              | Prev_NSaid                                  |
| 0                                          | 0                                  | 0                                   | 1                                      | 0                                           |
| Prev_A/A                                   | Prev_Others                        | Opiate Tolerance                    | Days of Medication Use                 | M1                                          |
| 0                                          | 0                                  |                                     | 3                                      | 1                                           |
| M2                                         | M3                                 | M4                                  | M5                                     | M6                                          |
| 1                                          | 1                                  | 1                                   | 1                                      | 1                                           |
| M7                                         | M8                                 | MMAS-8 Total Score                  | Duration of Analgesic Control          | Constipation                                |
| 1                                          | 0                                  | 7                                   | 5                                      | 0                                           |
| Nausea/Vomiting                            | Other Adverse Reactions            | Medication for Adverse Reactions    |                                        |                                             |
| 0                                          | 0                                  | 0                                   |                                        |                                             |
| Cancer Pain Medication Decision            |                                    |                                     |                                        |                                             |
| ERSO_Recom                                 | IRSO_Recom                         | ERWO_Recom                          | IRWO_Recom                             | NSAIDs_Recom                                |
| 1                                          | 0                                  | 0                                   | 0                                      | 1                                           |
| A/A_Recom                                  | Others_Recom                       | Constipation Medication Recommended | Nausea/Vomiting Medication Recommended |                                             |
| 0                                          | 0                                  |                                     |                                        |                                             |
| Evaluation of Previous Analgesic Treatment |                                    |                                     |                                        |                                             |
| Drug-Related Problems                      | Causes                             | Interventions                       | Acceptance of Interventions            | Status of DRPs                              |
| 2                                          | 1                                  | 10                                  | 1                                      | 3                                           |
| Follow-up                                  |                                    |                                     |                                        |                                             |
| Pain Relief Status                         |                                    |                                     |                                        |                                             |
| 1                                          |                                    |                                     |                                        |                                             |
